1 **Title:** Local Delivery of Soluble Fractalkine (CX<sub>3</sub>CL1) Peptide Restore Ribbon Synapses After Noise-Induced  
2 Cochlear Synaptopathy

3  
4 **Authors:** Vijayprakash Manickam<sup>1</sup>, Sibaprasad Maity<sup>1</sup>, Sree Varshini Murali<sup>1,2</sup>, Dinesh Y. Gawande<sup>1,2</sup>, Andrew  
5 R. Stothert<sup>1</sup>, Lyudamila Batakina<sup>1</sup>, Astrid Cardona<sup>3</sup>, Tejbeer Kaur<sup>1,2\*</sup>

6  
7 **Affiliations:** <sup>1</sup>Department of Biomedical Sciences, Creighton University, Omaha, Nebraska, 68178.

8 <sup>2</sup>Department of Otolaryngology, Robert Wood Johnson Medical School, Rutgers University, Piscataway, New  
9 Jersey, 08854. (Present Address).

10 <sup>3</sup>Department of Molecular Microbiology and Immunology, University of Texas, San Antonio, Texas, 78249

11 \*Corresponding author. Email address: [tk755@rwjms.rutgers.edu](mailto:tk755@rwjms.rutgers.edu)

12  
13 **Abstract:**

14 Efficacy of chemokine fractalkine isoforms was evaluated for restoration of loss of inner hair cell ribbon synapses  
15 and hearing after noise-induced cochlear synaptopathy (NICS). Previously, we have demonstrated a critical role  
16 for fractalkine signaling axis (CX<sub>3</sub>CL1-CX<sub>3</sub>CR1) in synaptic repair where in the presence of fractalkine receptor  
17 (CX<sub>3</sub>CR1) expressed by cochlear macrophages, the damaged synapses are spontaneously repaired. Here, we  
18 examined whether overexpression of fractalkine ligand (CX<sub>3</sub>CL1 or FKN) in the form of a peptide is effective in  
19 restoring the lost synapses and hearing after NICS. Remarkably, single transtympanic (TT) injection of soluble  
20 isoform of FKN (sFKN) peptide at 1 day after synaptopathic noise trauma showed significant recovery of ABR  
21 thresholds, ABR peak I amplitudes and ribbon synapses in both FKN-wildtype and knockout mice when  
22 compared to mice injected with full length membrane-bound FKN peptide (mFKN). Mechanistically, sFKN  
23 peptide treatment increased macrophage numbers in the cochlea and in the absence of those macrophages,  
24 sFKN failed to restore loss of synapses and hearing after NICS. Furthermore, sFKN treatment attenuated  
25 cochlear inflammation after noise overexposure without altering the expression of CX<sub>3</sub>CR1. Finally, sFKN peptide  
26 was detectable inside the cochlea localized to the sensory epithelium for 24 hours after TT injection. These data  
27 provide a robust proof-of-principle that local delivery of an immune factor, sFKN is effective in restoring lost

28 ribbon synapses and hearing after NICS in a macrophage-dependent manner and highlights the potential of  
29 sFKN as an immunotherapy for cochlear synaptopathy due to noise or aging.

30  
31 **Summary:** Transtympanic delivery of soluble FKN peptide is effective in restoring lost inner hair cell ribbon  
32 synapses and hearing after noise-induced cochlear synaptopathy in a macrophage-dependent manner.

## 34 INTRODUCTION

35 Nearly 30 million Americans (18%) of ages 20-69 have hearing loss in both ears and 48 million have hearing  
36 loss in at least one ear from exposure to loud noise (National Institute on Deafness and Other Communication  
37 Disorders, NIDCD). The prevalence of noise-induced hearing loss in the military population is more significant  
38 than in the general public. As per the Department of Veterans Affairs, there are an estimated 1.3 million Veterans  
39 with a Service-related disability due to hearing loss (1). Noise exposure causes hearing loss due to damage to  
40 the sensory hair cells of the inner ear (2) or due to loss of synaptic contacts (a.k.a. ribbon synapse) between  
41 inner hair cells (IHCs) and peripheral dendrites of the spiral ganglion neurons (SGNs) (3, 4). Synaptic loss can  
42 trigger gradual degeneration of peripheral axons and ultimately death of SGNs (4). The consequences of  
43 synaptic and neuronal loss are deficits in hearing acuity, leading to difficulty in speech recognition and listening  
44 in noisy environments (5). This type of auditory dysfunction is referred to as noise-induced cochlear synaptopathy  
45 (NICS) or hidden hearing loss (HHL) because it can precede hair cell dysfunction or loss and is not readily  
46 diagnosed by standard clinical hearing tests such as auditory brainstem responses (ABRs) and distortion product  
47 otoacoustic emissions (DPOAEs). Notably, Veterans reporting high levels of military noise exposure display  
48 reduced suprathreshold ABR peak I amplitudes, which is a functional proxy read out for cochlear synaptopathy  
49 (6). Currently, there are no FDA-approved drugs that elicit regeneration of lost SGNs and restore their synaptic  
50 connections with the surviving hair cells. Moreover, loss of SGNs can limit the effectiveness of primary therapies  
51 for hearing loss such as hearing aids and cochlear implants or any future hair cell regeneration therapies.  
52 Neurotrophins such as NT-3, BDNF or agonists for Trk receptor (Neurotrophin receptor) can partially regenerate  
53 synapses in pre-clinical animal models of NICS (7-11). However, such partial effectiveness clearly expresses an  
54 urgent need to further delineate the cellular and molecular mechanisms of SGN survival and synapse repair or

55 regeneration in order to identify newer targets and develop putative therapies to fully restore loss of synapses  
56 and hearing in NICS.

57 We have established a novel and critical role for cochlear macrophages (innate-immune cells) and fractalkine  
58 signaling in synaptic repair and SGN survival after NICS (12, 13). Fractalkine signaling axis (CX<sub>3</sub>CL1-CX<sub>3</sub>CR1)  
59 is a unique neuron-immune ligand-receptor pair in which fractalkine ligand (CX<sub>3</sub>CL1 or FKN), a chemokine, is  
60 constitutively expressed on neurons in the central nervous system (CNS) (14, 15) and on mouse SGNs and  
61 IHCs (16) and human SGNs (17). FKN is the exclusive ligand of a G-protein coupled receptor, CX<sub>3</sub>CR1, which  
62 is expressed by both human and mouse microglia (brain resident macrophages) (18) and cochlear resident  
63 macrophages (19). FKN is the only member of the CX<sub>3</sub>C, or delta, chemokine subfamily (20, 21). Unlike most  
64 other chemokine, FKN is a 395 amino acid (aa) type I transmembrane protein (22), including a signal sequence  
65 (aa 1-24), a chemokine domain (aa 25-100), a mucin stalk region (aa 101-336), a transmembrane segment (aa  
66 337-357), and a cytoplasmic tail (aa 358-395). FKN exists in two different forms: a membrane-bound protein  
67 (mFKN) tethered to neuronal membranes by a mucin-like stalk and a soluble factor (sFKN) released upon  
68 cleavage of its N-terminal chemokine domain by metalloproteinases (23, 24). The soluble chemokine domain of  
69 fractalkine acts as a chemoattractant promoting migration of immune cells expressing CX<sub>3</sub>CR1, while the  
70 membrane-tethered mucin-stalk of fractalkine acts as an adhesion molecule for leukocytes to endothelium during  
71 tissue injury (25, 26). Pre-clinical animal studies in the CNS have shown that neurotransmitter glutamate-induced  
72 excitotoxic injury activate and recruit microglia to the site of injury and that those microglia protect neurons and  
73 improve synaptic recovery following excitotoxic damage (27-31). Such microglia-mediated protection against  
74 CNS excitotoxicity have been partly attributed to fractalkine signaling (32-42). Moreover, overexpression of the  
75 soluble isoform of FKN (sFKN) confers neuroprotection, synaptic recovery, and improved function in animal  
76 models of several neurodegenerative and neuroinflammatory disorders (43-56).

77 We have demonstrated that noise trauma that induces a temporary shift in hearing thresholds (TTS) without  
78 any significant hair cell damage and/or loss causes rapid degeneration of IHC ribbon synapses and migration of  
79 resident cochlear macrophages into the damaged IHC-synaptic region (12). We and others have reported that  
80 noise-damaged IHC synapses can undergo spontaneous repair/regeneration in zebrafish, mice, guineapigs and  
81 gerbil (12, 13, 57-66). We have also shown that genetic disruption of fractalkine signalling due to lack of CX<sub>3</sub>CR1

82 receptor on macrophages or absence of cochlear resident macrophages hampers spontaneous synaptic repair  
83 and augments SGN loss and inflammation after noise trauma (12, 13, 67). These results suggest that  
84 endogenous intact fractalkine signaling axis plays a key role in synaptic repair and SGN survival through  
85 suppression of inflammation in noise-damaged cochlea. So, we probed, does boosting the cochlear FKN levels  
86 adequate to restore loss of synapses and hearing after NICS? Our data serves as a robust proof-of-principle that  
87 local delivery of an immune factor, sFKN peptide is effective in restoring the loss of IHC ribbon synapses and  
88 hearing after NICS and such sFKN-mediated synaptic repair is dependent on cochlear macrophages.  
89 Furthermore, our data demonstrate that transtympanically delivered sFKN peptide localizes to the sensory  
90 epithelium and resolves inflammation due to NICS. These findings highlight the potential of sFKN as an  
91 immunotherapy for cochlear synaptopathy due to either noise or biological aging.

## 92

## 93 RESULTS

### 94 **sFKN is more effective than mFKN in recovering ABR threshold shifts after NICS in FKN KO mice**

95 Our overarching goal in this study was to evaluate the efficacy of FKN isoforms (membrane-bound and soluble)  
96 in restoration of loss of IHC ribbon synapses and hearing after NICS. We first assessed the efficacy of FKN  
97 isoforms in the recovery of ABR threshold shifts and peak I amplitudes after NICS. Gross hearing function and  
98 IHC ribbon synapse density in unexposed FKN KO mice were comparable to the age-matched unexposed WT  
99 mice (Fig. S1). At 1 DPNE, both FKN WT and KO mice showed similar degree of elevation in ABR thresholds  
100 with FKN KO mice displaying ~10 dB higher threshold shifts than FKN WT mice when compared to the thresholds  
101 before noise exposure (Fig. 1B and C). There was an average 40 dB and 50 dB shift in ABR thresholds at  
102 stimulus frequencies of 16 kHz and above at 1 DPNE in the FKN WT and KO mice, respectively. By 15 DPNE,  
103 vehicle-treated WT mice showed a robust recovery in ABR threshold shift whereas, similar level of recovery was  
104 not observed in the vehicle-treated FKN KO mice (Fig. 1B and C). Remarkably, this loss of function in the noise-  
105 exposed FKN KO mice was significantly rescued by the single transtympanic administration of sFKN peptide,  
106 and the degree of recovery was comparable to vehicle-treated FKN WT mice (Fig. 1F). Whereas there was little  
107 to no recovery in ABR threshold shifts in the noise-exposed FKN KO mice injected with either mFKN peptide  
108 (Fig. 1E) or control peptide (Fig. 1D). There was no significant difference in the DPOAE levels at 15 DPNE when

109 compared to pre-noise exposure among the experimental groups (Fig. S2). Furthermore, lack of FKN did not  
 110 influence the survival of inner and outer hair cells in both unexposed and noise-exposed mice (Fig. S3).

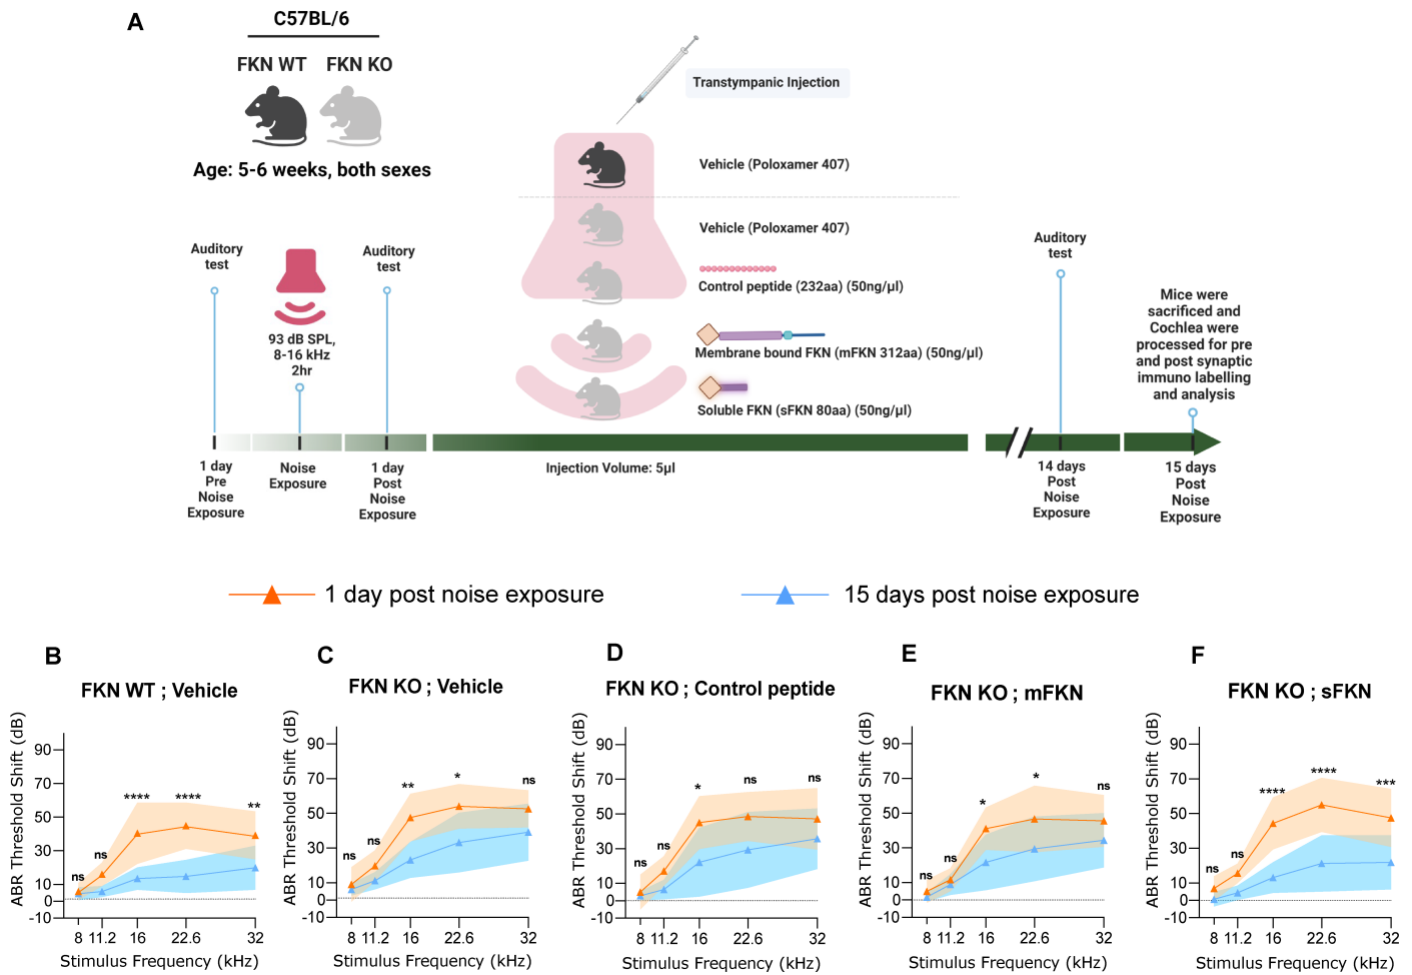

111

112 **Fig. 1. ABR threshold shifts at 1 DPNE and 15 DPNE.** (A) Study design created with BioRender.com. (B-F)  
 113 ABR threshold shifts at 1 DPNE and 15 DPNE for 2 hours at 93 dB SPL at 8-16 kHz octave band from (B) FKN  
 114 WT mice treated with vehicle (N=8), and FKN KO mice treated with (C) vehicle (N=6) (D) control peptide (N=7)  
 115 (E) membrane-bound FKN peptide (mFKN) (N=9) and (F) soluble FKN peptide (sFKN) (N=8). Values are means  
 116  $\pm$  SD. \*P < 0.05, \*\*P < 0.01, \*\*\*P < 0.001, \*\*\*\*P < 0.0001 and ns, non-significant at respective stimulus frequency.  
 117 \*Represents comparison between 1 DPNE and 15 DPNE, 2-way ANOVA, Sidak's multiple comparisons. Dashed  
 118 line represent threshold shifts prior to noise exposure (baseline).

119

120 **sFKN is more effective than mFKN in restoring ABR peak I amplitudes after NICS in FKN KO mice**

121 Despite of the spontaneous recovery of ABR threshold shifts by 15 DPNE, FKN WT mice have not recovered  
122 the reduced ABR-P-I amplitude at 32 kHz (basal cochlear region) (Fig. 2A), displaying the hallmark of noise-  
123 induced hidden hearing loss (4). The functional input/output series shows significant reduction in ABR P-I  
124 amplitudes at suprathreshold sound levels at 1 DPNE and 15 DPNE compared to amplitudes at pre-noise  
125 exposure (baseline). Similarly, none of the FKN KO mice injected with either vehicle, control peptide or mFKN  
126 peptide showed recovery in reduced ABR-P-I amplitude at 32 kHz (Fig. 2B, C and D). However, FKN KO mice  
127 TT injected with a single dose of sFKN peptide displayed robust recovery of reduced ABR-P-I amplitudes to  
128 baseline amplitudes at 15 DPNE (Fig. 2E). There was no significant change observed in ABR-P-I amplitudes at  
129 8 kHz and 16 kHz in any of the experimental groups (Fig. S4). Similarly, ABR-P-I latencies at 8 kHz, 16 kHz and  
130 32 kHz were largely unaffected among the experimental groups at all recovery time points after noise trauma  
131 (Fig. S5). Among the FKN isoforms, overexpression of sFKN peptide restored ABR thresholds and P-I amplitudes  
132 in both male and female FKN KO mice but the recovery was more robust in female FKN KO mice (Fig. S6).  
133 Collectively, this and above data implicate that cochlear endogenous FKN regulate the recovery of loss of hearing  
134 sensitivity and that overexpression of sFKN peptide in mice lacking endogenous FKN is more effective than  
135 mFKN peptide in restoring hearing loss after NICS.

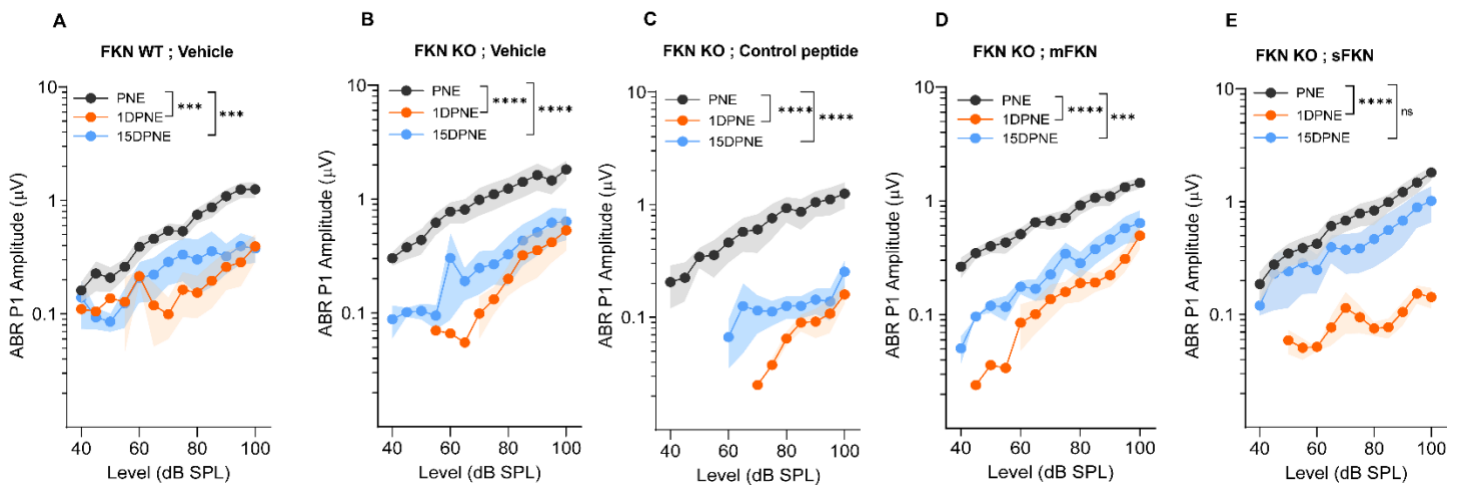

136

137 **Fig. 2. ABR peak I amplitude at 32 kHz at Pre-noise exposure (PNE), 1 DPNE and 15 DPNE.** ABR peak I  
138 amplitudes at 32 kHz in (A) FKN WT mice treated with vehicle (N=8), and in FKN KO mice treated with (B)  
139 vehicle (N=6) (C) control peptide (N=7) (D) membrane-bound FKN peptide (mFKN) (N=10) and (E) soluble FKN  
140 peptide (sFKN) (N=8). Values are means  $\pm$  SD. \*\*\*P < 0.001, \*\*\*\*P < 0.0001 and ns, non-significant. \*Represents

141 the comparison between the experimental time points as indicated with parenthesis. 1-way ANOVA, Tukey's  
142 multiple comparisons test.

### 144 **Single TT injection of sFKN peptide restore noise-damaged ribbon synapses in FKN KO mice**

145 In order to validate the functional recovery of the IHC ribbon synapses, microdissected cochleae were  
146 immunolabelled for presynaptic CtBP2 ribbons and postsynaptic GluA2 AMPA receptors (Fig. 3A). Compared to  
147 unexposed groups, there was a significant reduction in the absolute CtBP2 punctae (Fig. 3B), absolute GluA2  
148 punctae (Fig. 3C) and paired synapses (Fig. 3D) per IHC (from ~18 to ~10 punctae or synapses per IHC) in the  
149 basal region of the cochlea of noise-exposed groups at 15 DPNE, irrespective of the genotype. Among the noise-  
150 exposed FKN KO groups, mice TT injected with sFKN peptide showed a significant restoration of GluA2 punctae  
151 and paired synapses per IHC (from ~10 to ~17 punctae or synapses per IHC) when compared to mice injected  
152 with mFKN peptide or with control peptide (Fig. 3C and D). Notably, the synaptic repair due to the sFKN peptide  
153 treatment is comparable to the IHC synaptic density in unexposed FKN KO group. Such structural recovery of  
154 synapses positively correlates with the functional recovery of ABR peak I amplitude (Fig. 2E) and suggest that  
155 between the two FKN isoforms, sFKN is more efficacious in restoring damaged synapses after NICS, both  
156 structurally and functionally. There was no significant loss in the absolute CtBP2 punctae, GluA2 punctae and  
157 paired ribbon synapses per IHC in apical and middle cochlear regions in all the noise-exposed experimental  
158 groups at 15 DPNE (Fig. S7).



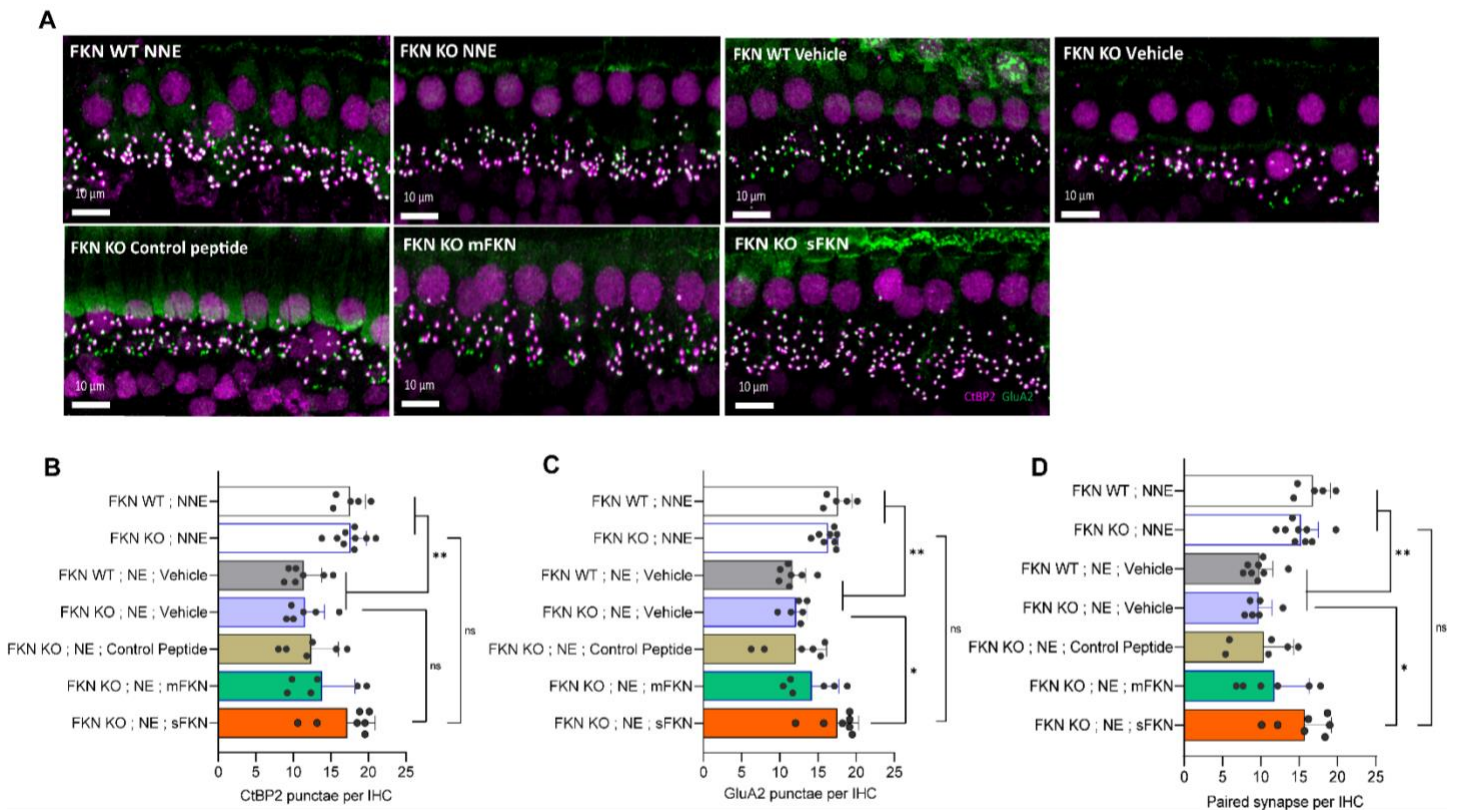

**Fig. 3. Inner hair cell ribbon synapses in basal cochlear region at 15 DPNE.** (A) Representative micrographs showing IHC paired ribbon synapses in basal cochlear region after 15 days of synaptopathic noise exposure. (B) Absolute CtBP2 punctae per IHC. (C) Absolute GluA2 punctae per IHC. (D) Paired ribbon synapses per IHC. Values are mean  $\pm$  SD. Each dot in the graphs represents a mouse. \*\* $P < 0.01$  between no noise exposed (NNE) vs. noise exposed vehicle treated FKN WT and FKN KO mice; \* $P < 0.05$  between noise exposed FKN KO mice treated with vehicle or sFKN peptide; ns: non-significant between NNE and NE sFKN treated FKN KO mice. 1-way ANOVA, Dunnett's multiple comparisons test.  $N=5-9$  mice per experimental group.

### Single TT injection of sFKN peptide restore noise-damaged ribbon synapses in FKN WT mice

As there was no spontaneous synaptic repair observed in the basal cochlear region of the noise-exposed FKN WT mice at 15 DPNE (Fig. 3) therefore, we hypothesized that this is likely due to the inadequate levels of cochlear endogenous FKN ligand promoting synaptic repair after NICS (Fig. S8). To test whether sFKN peptide also restores noise-damaged ribbon synapses in FKN WT mice, we overexpressed sFKN peptide by TT injection in FKN WT mice at 1 day post noise exposure and analyzed ABR P-I amplitudes at 32 kHz (Fig. 4A) and IHC ribbon synapse density in the basal cochlear region (Fig. 4B and C). There was a significant reduction in ABR P-I



175 amplitude at 1 DPNE compared to the pre-noise exposure (baseline) that was partially but significantly recovered  
176 by 15 DPNE in FKN WT mice due to sFKN peptide treatment post noise exposure. Moreover, noise-damaged  
177 IHC ribbon synapses were robustly restored as a result of treatment with sFKN peptide (from ~9 to ~13 synapses  
178 per IHC). This data suggests that the overexpression of sFKN peptide by single TT injection can restore noise-  
179 damaged IHC ribbon synapses both functionally and structurally in the wild-type mice besides FKN KO mice.

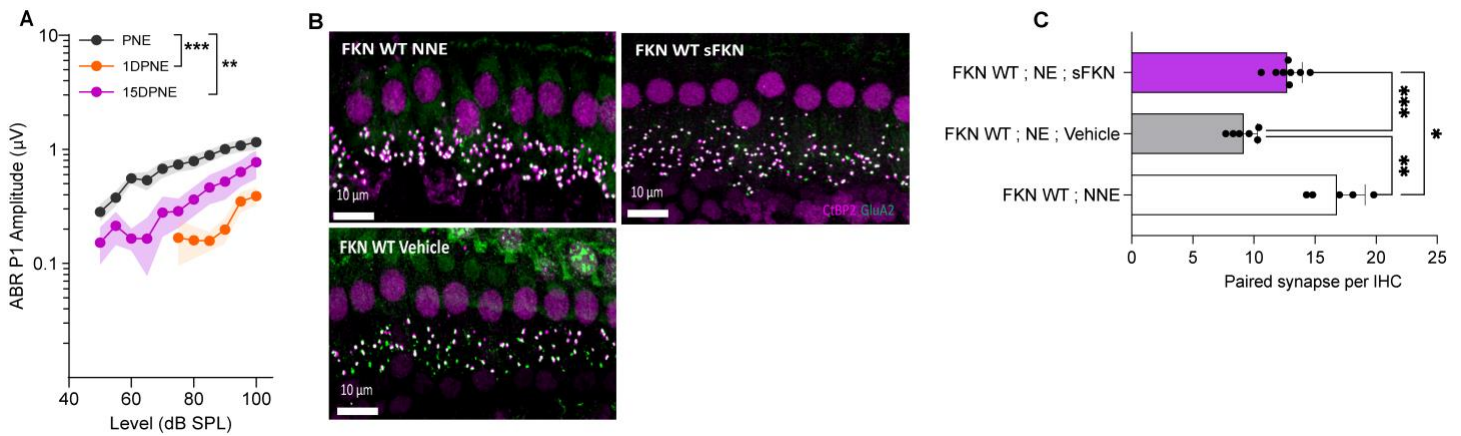

180  
181 **Fig. 4. ABR peak I amplitude and IHC ribbon synapse density in FKN WT mice TT injected with sFKN**  
182 **peptide.** (A) ABR peak I amplitude at 32 kHz at pre-noise exposure (PNE), 1 DPNE and 15 DPNE of FKN WT  
183 mice (N=8) injected TT with a single dose of sFKN peptide. (B) Representative micrographs showing IHC ribbon  
184 synapses from basal cochlear region at 15 DPNE. (C) Paired ribbon synapses per IHC. Values are means  $\pm$  SD.  
185 Each dot in the graph represents a mouse. \*P < 0.05, \*\*P < 0.01, \*\*\*P < 0.001 and ns, non-significant. 1-way  
186 ANOVA, Tukey's multiple comparisons test. FKN WT NNE and FKN WT vehicle data shown in B and C have  
187 been reused from Fig. 3 in order to reduce the use of numbers of mice as per IACUC policies.

### 188 **Cochlear macrophages are indispensable for sFKN-mediated IHC synaptic repair after NICS**

189 We have previously reported that cochlear resident macrophages are activated and migrate immediately into the  
190 sensory epithelium in close proximity to the damaged IHC synaptic region following a synaptopathic noise trauma  
191 (12). In order to determine whether chemokine FKN influence macrophage localization and numbers in the  
192 damaged sensory epithelium after NICS, cochlear whole mounts were immunolabeled for CD45, a pan-leukocyte  
193 marker. The macrophage numbers significantly increased in the middle (~2.5-fold) and basal (~2-fold) cochlear  
194 region of the damaged sensory epithelium of FKN WT mice after noise trauma nevertheless, such an increase  
195

196 in macrophage numbers was not observed in the noise-damaged sensory epithelium of FKN KO mice (Fig. 5A  
197 and B). There was no significant change in macrophage numbers in the apical region of the cochlea in both  
198 noise-exposed FKN WT and KO groups when compared to unexposed mice. This data suggests that chemokine  
199 FKN which is constitutively expressed by IHCs and SGNs control macrophage numbers in the sensory epithelium  
200 in response to NICS.

201 FKN binds to its sole receptor, CX<sub>3</sub>CR1 which is thought to be specifically expressed by macrophages  
202 (19). This fact and the data that both FKN (Fig. 5A and B) and CX<sub>3</sub>CR1 (16, 67) regulates macrophage density  
203 in the damaged cochlea prompted us to ask whether the sFKN-mediated synaptic repair is a direct effect of  
204 sFKN on IHC ribbon synapses and SGNs or does it require cochlear macrophages expressing CX<sub>3</sub>CR1. To  
205 determine whether macrophages are necessary for sFKN-mediated synaptic repair after NICS, cochlear  
206 macrophages were depleted in FKN WT mice via treatment with CSF1-R inhibitor, PLX5622 chow for 2 weeks  
207 which effectively results in ~94% ablation of cochlear resident macrophages (13) (also see Fig. S9). Following  
208 macrophage ablation, noise-exposed FKN WT mice were IT injected with either vehicle or sFKN peptide and  
209 synapses and function were analyzed at 15 DPNE. Depletion of cochlear macrophages with PLX5622 abrogated  
210 the ability of sFKN peptide to restore noise-damaged ribbon synapses (Fig. 5C and D) and ABR Peak I  
211 amplitudes (Fig. 5E) in FKN WT mice. Whereas sFKN peptide restored the loss of synapses and function in the  
212 presence of cochlear resident macrophages (control chow) in FKN WT mice (Fig. 5C-E, also see Fig. 4). The  
213 present data also corroborates our previous report by Manickam et al., 2023 (13) that the absence of cochlear  
214 macrophages impairs the recovery of ABR thresholds shifts which is not affected by sFKN peptide treatment,  
215 whereas elevated ABR thresholds recover in the presence of macrophages with or without sFKN treatment (Fig.  
216 S10A-D). DPOAE levels were comparable among the experimental groups (Fig. S10E-H). Mechanistically, these  
217 data implicate that sFKN peptide restore the noise-induced loss of IHC ribbon synapses and function in a  
218 macrophage-dependent manner.

219

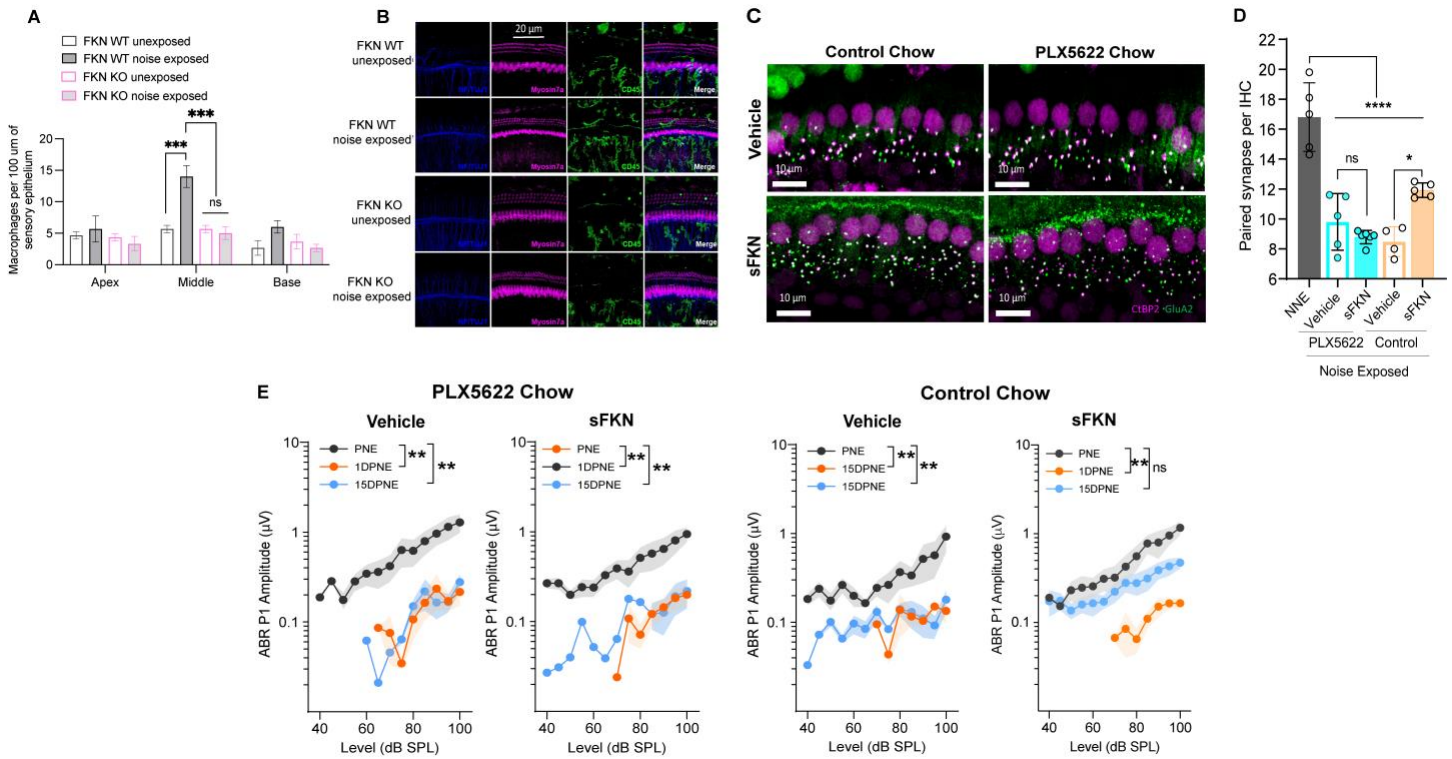

220

221

222

223

224

225

226

227

228

229

230

231

232

233

234

235

**Fig. 5. sFKN fails to restore noise-damaged IHC ribbon synapses and ABR Peak I amplitudes in FKN WT mice lacking cochlear resident macrophages.** (A) Macrophage density in the sensory epithelium of apex, middle and basal cochlear regions of unexposed and noise-exposed FKN WT and FKN KO mice. 2-way ANOVA, Tukey's comparison test. N=3 mice per genotype. (B) Representative micrographs showing CD45-immunolabeled macrophages in the sensory epithelium of the middle cochlear region of unexposed and noise-exposed FKN WT and FKN KO mice. (C) Representative micrographs showing IHC paired ribbon synapses from basal cochlear region of vehicle- or sFKN peptide-treated FKN WT mice in the presence (control chow) or absence (PLX5622 chow) of macrophages at 15 DPNE. (D) Quantification of paired ribbon synapses per IHC in vehicle- or sFKN peptide-treated FKN WT mice in the presence (control chow) or absence (PLX5622 chow) of macrophages at 15 DPNE. Gray bar represents unexposed (NNE) FKN WT mice data reused from Fig. 4C for comparison purposes and to reduce the use of numbers of mice as per IACUC policies. 2-way ANOVA, Tukey's comparison test. (E) ABR Peak I amplitudes at 32 kHz in vehicle- or sFKN peptide-treated FKN WT mice in the presence (control chow) or absence (PLX5622 chow) of macrophages at 15 DPNE. 1-way ANOVA, Dunnett's multiple comparisons test. N=5-7 mice per experimental group (D and E). Values are means  $\pm$  SD. \*P < 0.05, \*\*P < 0.01, \*\*\*P < 0.001, \*\*\*\*P < 0.0001 and ns, non-significant.

236

## 237 **NICS-induced proinflammatory cytokines is diminished by sFKN**

238 Noise-induced cochlear synaptopathy is associated with activation of macrophages (12) and upregulation of  
239 inflammation (68). Accordingly, as CX<sub>3</sub>CL1 signaling has been shown to attenuate the production of pro-  
240 inflammatory cytokines and decrease activation of macrophages *in vitro* and *in vivo* following various  
241 inflammatory stimuli (14, 69-76), we examined the pro-inflammatory reducing and anti-inflammatory enhancing  
242 properties of sFKN in response to NICS in the FKN WT mice. Cochlear protein lysates from no-noise exposed  
243 (NNE), noise-exposed plus TT injection of vehicle at 1 day post exposure (NE; vehicle) and noise exposed plus  
244 TT injection of sFKN peptide at 1 day post exposure (NE; sFKN) were collected at ~48 hours post noise exposure  
245 and analyzed for cytokines levels using Luminex-based multiplex technique. Production of pro-inflammatory  
246 cytokines such as IFN  $\beta$ , IL-2, IL-6, and IL-23 were significantly elevated in the cochleae injected with vehicle at  
247 1 day after a synaptopathic noise trauma when compared to no-noise exposed FKN WT mice. However,  
248 transtympanic treatment with sFKN peptide attenuated or maintained the levels of these cytokines similar to the  
249 levels found in the no-noise exposed FKN WT mice (Fig. 6A-D). Similarly, levels of anti-inflammatory cytokines  
250 such as IL-10, IL-22 and IL-33 were significantly reduced in the cochleae injected with vehicle at 1 day after a  
251 synaptopathic noise trauma when compared to no-noise exposed FKN WT mice but transtympanic treatment  
252 with sFKN peptide after noise trauma elevated or maintained their levels close to baseline (Fig 6E-G). We also  
253 measured the messenger RNA (mRNA) levels of cochlear CX<sub>3</sub>CR1 receptor that is exclusively expressed by  
254 macrophages in FKN WT mice following TT injection of sFKN peptide by RT-qPCR. No substantial change was  
255 detected in the expression of CX<sub>3</sub>CR1 mRNA among the unexposed, noise-exposed vehicle injected and noise-  
256 exposed sFKN injected groups at 2 and 24 hours post sFKN peptide injection (Fig. S11). Collectively, these  
257 results suggest that sFKN-mediated IHC synaptic repair after NICS is likely attributed to modulation of cochlear  
258 inflammation in response to NICS and not due to changes in the expression of CX<sub>3</sub>CR1 receptor on cochlear  
259 macrophages.

260

261

262

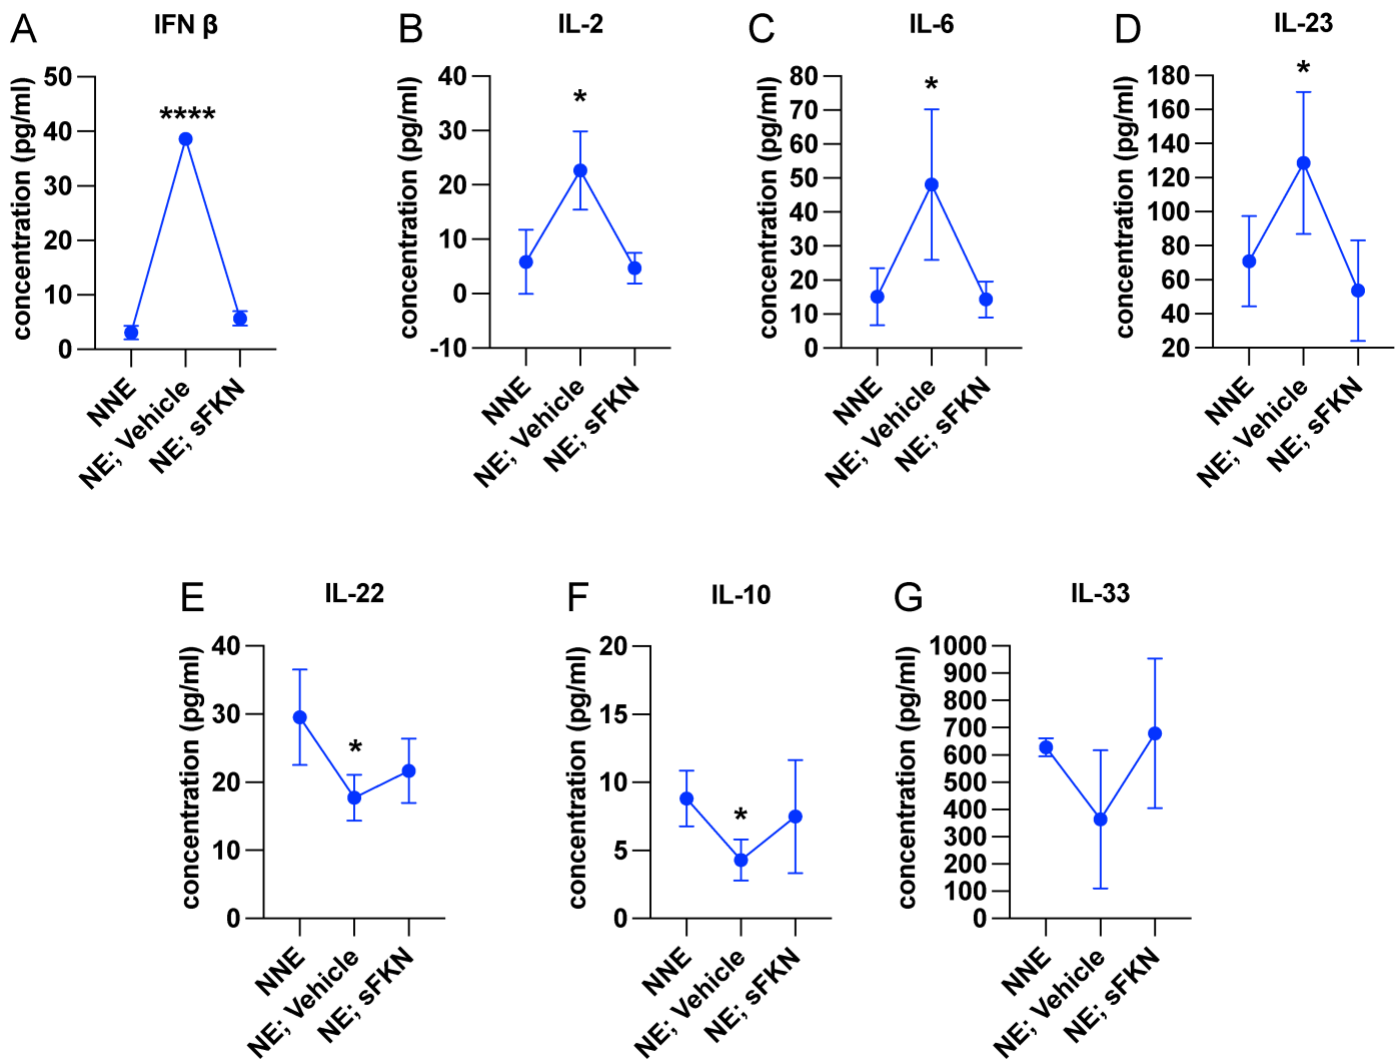

263  
264 **Fig. 6. sFKN peptide regulates cochlear inflammation profile after NICS.** Luminex assay-based  
265 quantification of the levels of cytokines (A) IFN  $\beta$ , (B) IL-2, (C) IL-6, (D) IL-23, (E) IL-22, (F) IL-10, and (G) IL-33  
266 in cochlear lysate from FKN WT mice subjected to either no-noise exposed (NNE) or noise-exposed and TT  
267 injected with vehicle at 1 day post exposure (NE; vehicle) or noise-exposed and TT injected with sFKN peptide  
268 at 1 day post exposure (NE; sFKN). N=3-4 biological samples per experimental group and each biological sample  
269 is a pool of five cochleae that is ran in triplicates. Values are means  $\pm$  SD. \*P < 0.05, \*\*\*\*P < 0.001 between NNE  
270 and NE; vehicle. There was no significant difference in the means between NNE and NE; sFKN or NE; vehicle  
271 and NE; sFKN experimental groups. 1-way ANOVA, Dunnett's multiple comparisons test.

272  
273 **sFKN peptide is bioavailable in the cochlea following transtympanic injection**

274 In order to verify that the TT injected sFKN peptide into the middle ear reaches the inner ear, cochlear protein  
275 lysate and perilymph were extracted at different time points after sFKN TT injection in FKN KO mice and sFKN  
276 level (cochlear bioavailability) was estimated by ELISA (Fig. 7A) and MALDI-TOF-MS (Fig. 7B and 7C),  
277 respectively. Compared to the uninjected or control ears, a significant level of sFKN was detected after 1 hour  
278 of TT injection in cochlear protein lysate by ELISA (Fig. 7A) and in perilymph by MALDI-TOF-MS (Fig. 7C).  
279 Approximately, 1/10 to 1/25 of the total sFKN peptide (250 ng in 5  $\mu$ l at a concentration of 50 ng/ $\mu$ l) injected  
280 transtympanically into the middle ear reaches inside the cochlea. The sFKN level in the cochlea was maintained  
281 for 12 hours post injection after which the level started to decline by 24 hours post injection. Additionally, mouse  
282 sFKN conjugated to Alexa Fluor 647 (sFKN-647) was TT injected in FKN WT mice to visualize the spatial  
283 distribution of sFKN-647 at 3 hours post injection. Data shows that injected sFKN-647 distributes into the  
284 cochlear sensory epithelium, spiral limbus, spiral lamina, and spiral ligament in all three turns at 3 hours post  
285 injection (Fig. 7D, right panel) when compared to the uninjected ear (Fig. 7D, left panel). Likewise, elevated  
286 mean fluorescence intensity of conjugated sFKN-647 in cochlear perilymph was detected at 3 hours after TT  
287 injection (Fig. S13). Notably, increased numbers of CD45 immunolabeled cochlear macrophages were seen in  
288 the sensory epithelium and osseous spiral lamina at 3 hours after sFKN-647 TT injection (Fig. 7D, bottom right  
289 panel) when compared to uninjected ear (Fig. 7D, bottom left panel). Collectively, these data from different  
290 complementary approaches confirm that sFKN peptide is bioavailable in the cochlea for up to 24 hours after TT  
291 injection and it is localized to the sensory epithelium and spiral lamina where it restores the noise-damaged IHC  
292 ribbon synapses and function.



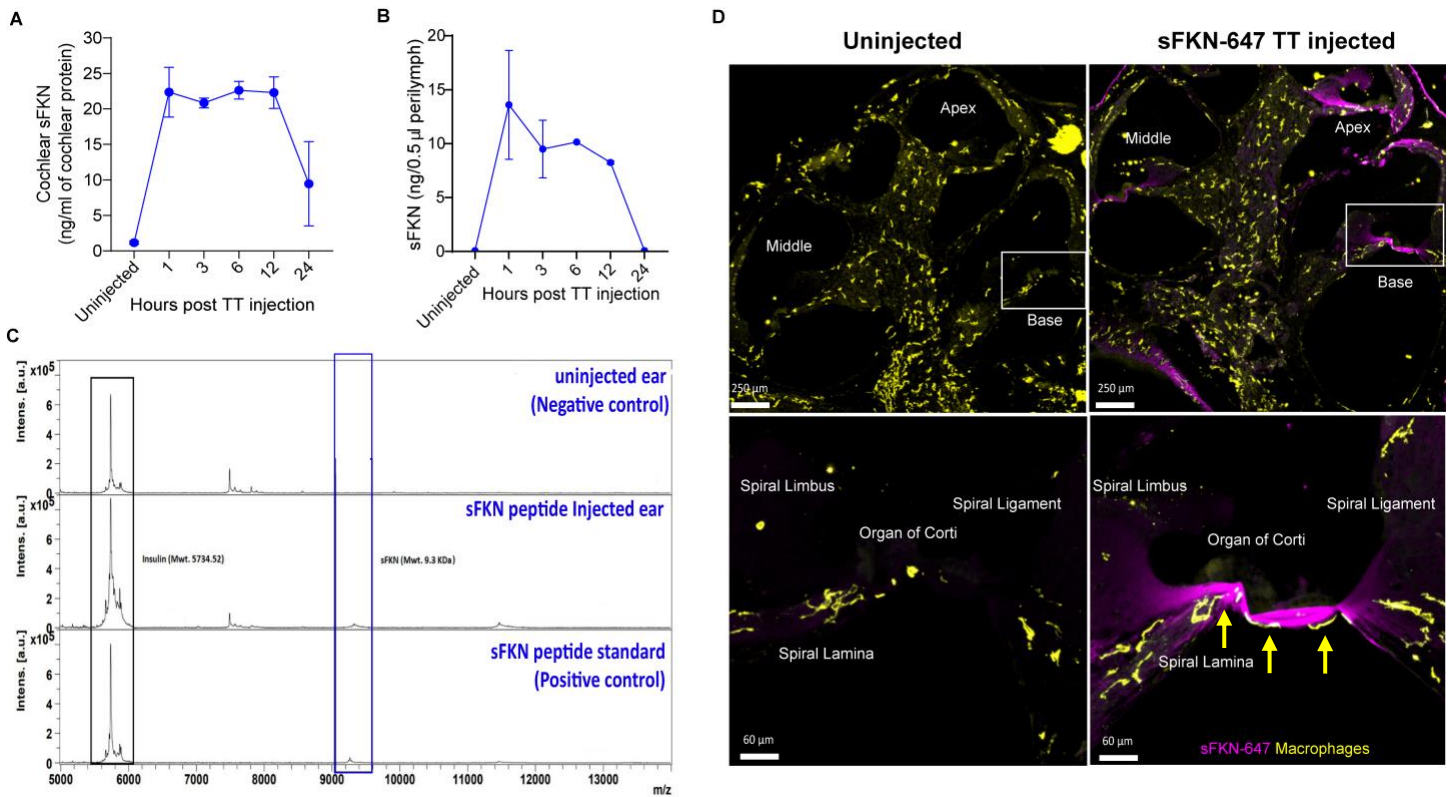

**Fig. 7. Temporal and spatial bioavailability of sFKN peptide after TT injection in FKN KO and FKN WT mice.** Estimation of levels of sFKN peptide in (A) cochlear protein lysate by ELISA and (B) cochlear perilymph by MALDI-TOF-MS at different time points after TT injection in FKN KO mice. N=2 biological replicates per time point (A and B). Values are means  $\pm$  SD. (C) Representative MALDI-TOF mass spectrometric peaks of sFKN peptide (9.3 kDa) at 3 hours after TT injection in FKN KO mice when compared to uninjected ear (blue rectangle). Peak in the bottom panel represent that of the standard sFKN peptide of 9.3 kDa as positive control. Peaks of the left represent that of insulin peptide as internal control. (D) *Upper panel*, representative images of cochlear midmodiolar cross-section at low magnification and *bottom panel*, representative images at higher magnification of the basal cochlear turn (white rectangular box in upper panel) showing the distribution of fluorescent conjugated sFKN-647 (magenta) in the sensory epithelium, spiral limbus, osseous spiral lamina and spiral ligament of uninjected and TT injected FKN WT mice. Notably, more CD45-immunolabeled macrophages (yellow cells, also see yellow arrows) are found in the sensory epithelium at 3 hours after sFKN-647 TT injection (right, bottom panel).

## Working Model

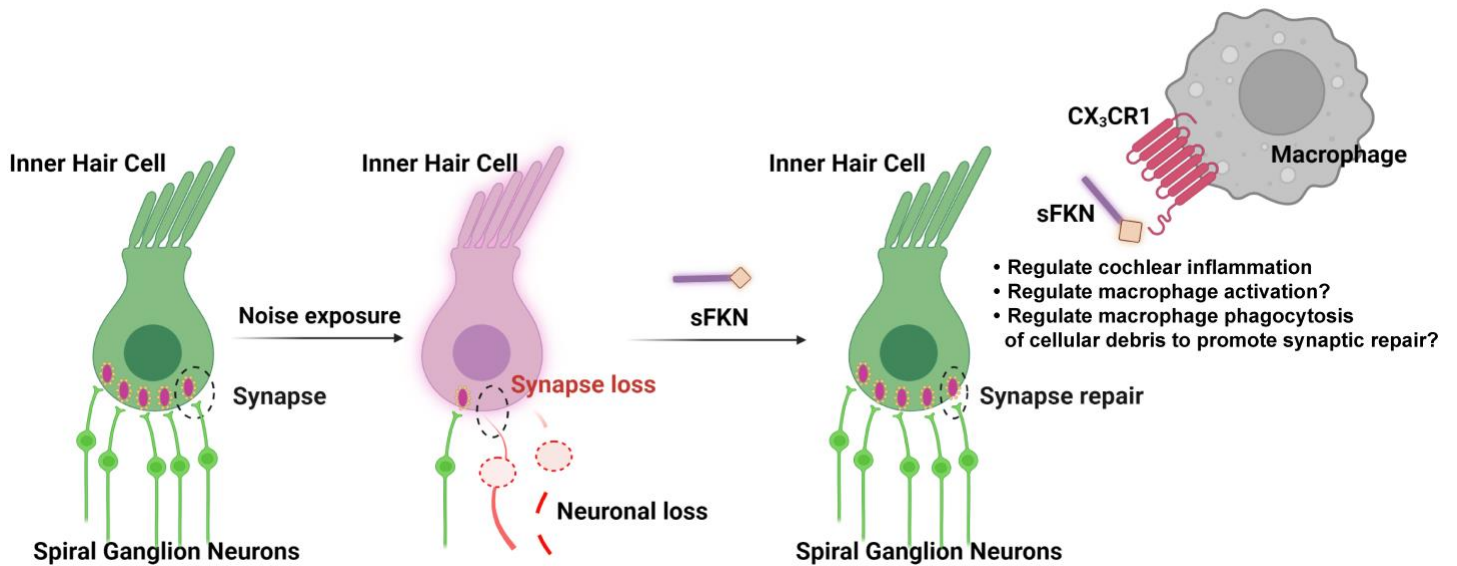

**Fig. 8. Working model for soluble FKN restores IHC ribbon synapses after NICS.** Prolonged or loud exposure to noise results in rapid loss of IHC ribbon synapses known as cochlear synaptopathy. Locally (transtympanically) delivered immune factor, soluble FKN reaches the cochlear sensory epithelium of the inner ear and is effective in restoring the noise-induced loss of IHC ribbon synapses and hearing via cochlear macrophages expressing CX<sub>3</sub>CR1. The precise molecular mechanism by which sFKN-macrophage interaction restore damaged ribbon synapses remains to be elucidated. Figure is created with BioRender.com.

## DISCUSSION

In this study, we specifically assessed the efficacy of FKN isoforms i.e., soluble, and membrane-bound in restoration of loss of IHC ribbon synapses and hearing after synaptopathic noise trauma. The present study offers compelling evidence that soluble FKN peptide is more effective than membrane-bound FKN in restoring lost IHC ribbon synapses and hearing in a mouse model of NICS. IHC synaptic repair with sFKN requires the presence of cochlear resident macrophages and attenuation of inflammation due to NICS without altering the expression of CX<sub>3</sub>CR1 receptor on cochlear macrophages. We also report that sFKN peptide is bioavailable in the cochlea for 24 hours after a single transtympanic injection and it is localized to the sensory epithelium and spiral lamina where it restores the synaptopathic noise-damaged IHC ribbon synapses and function (Fig. 8). While the mechanism by which sFKN restore ribbon synapses remains to be elucidated, our findings suggest

327 that sFKN therapy could be beneficial for patients with NICS, and potentially for other patients with cochlear  
328 synaptopathy that affect understanding of speech or central auditory processing disorders.

329 FKN is a 373-aa protein with a single transmembrane domain that can undergo proteolytic cleavage to  
330 release sFKN into the extracellular environment (20). In the CNS, both mFKN and sFKN are primarily produced  
331 by neurons, and by binding CX<sub>3</sub>CR1 on microglia, they are thought to regulate key aspects of microglial  
332 physiology (56, 77). One of the main tasks of FKN in neuron–microglia interactions is to suppress the activation  
333 of microglia (72, 78). Supporting this notion, exogenous delivery of sFKN has been shown to decrease microglia  
334 activation as well as neurological deficits in animal models of Parkinson’s disease, stroke, retinitis pigmentosa,  
335 and diabetic retinopathy (39, 44, 47, 50, 52). In the cochlea, FKN is constitutively expressed by sensory SGNs,  
336 IHCs and certain supporting cells (16) and sFKN is released after selective cochlear hair cell ablation (16), or  
337 after NICS (Fig. S8) or it is upregulated after a PTS-imparting noise trauma (79). Moreover, in the absence of  
338 CX<sub>3</sub>CR1 on cochlear macrophages there is an impairment in spontaneous synaptic repair and enhanced loss of  
339 SGNs and IHCs after NICS (12). Based on these data, we boosted the levels of FKN in the cochlea at 1-day  
340 after a synaptopathic noise trauma for 2 hours at 93 dB SPL with the hope that it would restore the damaged  
341 IHC ribbon synapses and hearing function. Single transtympanic injection of sFKN indeed restored noise-  
342 damaged synapses and hearing function and it did so in the presence of cochlear macrophages and by  
343 attenuating inflammation due to NICS. Remarkably, synaptic repair was seen with the treatment of sFKN, but  
344 not with full-length membrane-bound FKN (mFKN) which strongly corroborates the pre-clinical animal studies in  
345 the CNS (45, 52). This could be due to differences in the bioavailability of the transtympanically injected peptides  
346 where sFKN as being smaller peptide (9.3 kDa) than mFKN peptide (34 kDa) crosses the round and/or oval  
347 window membrane and is better able to reach cochlear resident macrophages. Of note, we found using three  
348 complimentary approaches i.e., ELISA, MALDI-ToF-MS and conjugated sFKN-647 that TT injected sFKN  
349 peptide reaches the cochlea and it is bioavailable for 24 hours post injection that might be sufficient to ligate to  
350 CX<sub>3</sub>CR1 on cochlear resident macrophages to activate downstream signaling in those macrophages and restore  
351 synapses. Alternatively, it could be that ligation with only sFKN but not the mFKN allows for CX<sub>3</sub>CR1  
352 internalization to the cytoplasm following ligation to affect downstream signaling pathway (45, 80, 81). Although  
353 ligation of mFKN with CX<sub>3</sub>CR1 is possible through the chemokine domain but its permanent attachment to the

354 membrane may prevent subsequent internalization to the cytoplasm of macrophages, thereby altering any  
355 downstream effectors. Therefore, only the soluble domain of FKN can be readily internalized with CX<sub>3</sub>CR1  
356 ligation. This notion that CX<sub>3</sub>CR1 actively removes sFKN from the surrounding environment is supported by  
357 Cardona et al., 2008, where the authors reported substantially more circulating or soluble FKN in CX<sub>3</sub>CR1<sup>-/-</sup> mice  
358 (82). By using FKN KO mice, we were able to isolate the effects of individual FKN isoform in synaptic repair in  
359 response to NICS. sFKN restored noise-damaged ribbon synapses and hearing function in both FKN KO and  
360 WT mice. While synaptic repair was near to complete in the FKN KO mice, it was incomplete yet significant in  
361 the FKN WT mice. This effect could be due to the pharmacological ceiling effect of exogenous sFKN in the  
362 wildtype mice which also releases endogenous sFKN after NICS (Fig. S8) (44) which suggest that sFKN  
363 pharmacological potency or dose response studies are further warranted.

364 Activated macrophages are associated with damaged ribbon synapses in response to NICS, given their  
365 immediate migration into the IHC synaptic region, upregulation of inflammatory genes, and phagocytosis of  
366 debris (12, 66, 68). These macrophage activities are beneficial in NICS by promoting IHC synaptic repair, as  
367 pharmacological ablation of macrophages has been demonstrated to impair spontaneous synaptic repair (13).  
368 Here, we found evidence of macrophage activation during NICS, as illustrated by the presence of macrophages  
369 in the sensory epithelium near to the IHC synaptic region, consistent with our previous report (12). Interestingly,  
370 these macrophages were absent or reduced in numbers in the cochlear sensory epithelium of mice lacking FKN,  
371 suggesting a critical role of endogenous FKN in localizing macrophages to the sensory epithelium in response  
372 to NICS. Likewise, more macrophages were localized to the sensory epithelium with the overexpression of  
373 conjugated sFKN-647 peptide in the undamaged cochlea, further supporting the notion that FKN may be the  
374 potential chemoattractant for macrophages at least during acute cochlear injury such as NICS. Importantly, FKN  
375 contributes to wound healing or repair by recruiting macrophages to the site of injury in a mouse model of skin  
376 excision (83). Notably, depletion of cochlear resident macrophages abrogated sFKN-mediated restoration of IHC  
377 ribbon synapses and function. This indicate that sFKN restores synapses after NICS in a macrophage-dependent  
378 manner. We have previously reported that CX<sub>3</sub>CR1, specifically expressed by macrophages is necessary for  
379 spontaneous repair of IHC ribbon synapses after NICS as deficiency of CX<sub>3</sub>CR1 has been demonstrated to  
380 impair synaptic repair (12). Here, we found that overexpression of sFKN did not alter the mRNA expression of

381 cochlear CX<sub>3</sub>CR1. Consistent with this, it has been reported that sFKN therapy also does not affect the protein  
382 levels of CX<sub>3</sub>CR1 in the brain (45). While sFKN does not alter the levels of CX<sub>3</sub>CR1 receptor, whether CX<sub>3</sub>CR1  
383 activation is critical for sFKN-mediated synaptic repair remains to be elucidated. Studies in the CNS have  
384 demonstrated an upregulation of lysosomal pathways in microglia with sFKN therapy, a prominent feature of  
385 activated microglia, implicating that these cells may more efficiently digest or phagocytose cellular debris thus  
386 favoring preservation of neurons (52). Moreover, sFKN therapy attenuates the induction of proinflammatory  
387 cytokines in microglia, in other words it represses microglial response, as prolonged or uncontrolled induction  
388 can result in chronic inflammation, thereby leading to neurodegeneration (42, 45, 84, 85). Here, we also found  
389 evidence for macrophage activation during NICS, as demonstrated by upregulation of IFN  $\beta$ , IL-6, IL-2, 1L-23  
390 cytokines in whole cochlear protein lysates. Remarkably, overexpression of sFKN attenuated or maintained the  
391 production of these cytokines to a similar level found in the undamaged cochlea. Our data are consistent with  
392 the CNS studies and indicate a plausible mechanism by which sFKN restore synapses partly by modulating  
393 cochlear inflammation, although how does inflammation disrupts intact synapses or impairs synaptic repair  
394 remains to be determined. While our data indicate that macrophages are obligatory for sFKN to mediate synaptic  
395 repair, the effect of sFKN on phagocytic or lysosomal activation of cochlear macrophages and the mechanisms  
396 by which sFKN-macrophage interaction promote synaptic repair remains to be elucidated.

397 Our data provide convincing evidence for the presence of sFKN peptide in the cochlea after a single TT  
398 injection in the middle ear. Targeted or local delivery like TT injection is preferable to systemic administration  
399 because this can circumvent the side effects and other undesirable effects of the FKN i.e., macrophage activation  
400 in peripheral organs or in circulation (86), which in turn may allow for higher local doses and longer treatment  
401 durations. Actually, repeated TT injections of gentamicin antibiotics or steroids are routinely done in clinical  
402 practice for treating Meniere's disease or idiopathic sudden sensorineural hearing loss, respectively (87). TT  
403 injection is also preferred over invasive round window or semicircular canal delivery that leads to inflammation  
404 and immune response thereby, requiring further treatment with steroids. Notably, transtympanically injected  
405 sFKN peptide was distributed throughout all the cochlear turns and was specifically localized to the sensory  
406 epithelium and spiral lamina in each turn where the IHC ribbon synapses are damaged after NICS. This is  
407 particularly interesting because sFKN has direct access to the damaged site to promote synaptic repair and was



408 also associated with increased macrophages in the same cochlear region. Both ELISA and mass spectrometry  
409 data revealed the cochlear bioavailability of sFKN peptide with sustained levels for up to 12 hours after which  
410 levels started to reduce. This reduction in sFKN levels could be due to proteolytic degradation of the peptide by  
411 proteases and peptidases present in the inner ear fluids (88). This could be a limitation of FKN peptide-based  
412 therapy however, this critical data has opened new avenues for the development of better analogues of sFKN  
413 peptide resistant to proteolytic degradation or small molecule agonists of CX<sub>3</sub>CR1 (FKN-mimetic) with desirable  
414 bioavailability. Gene therapy for sFKN can also be employed to achieve prolonged bioavailability of sFKN (45,  
415 47, 52, 55, 84, 85) but, cochlear delivery and cell specific transduction of genes is still challenging and entails a  
416 risk for immunosuppression. On the contrary, as peptides are short acting, their therapeutic efficacy, potency,  
417 and toxicity can be tightly regulated versus gene therapy. In addition, modulation of FKN signaling with peptides  
418 could provide a new prevention and treatment platform for noise-induced hearing loss since peptides present an  
419 opportunity for therapeutic intervention that closely mimics natural pathways. Nonetheless, we consider that  
420 reported bioavailability of sFKN in the present study is sufficient to ligate CX<sub>3</sub>CR1 and recruit macrophages to  
421 the damaged IHC synaptic region in the sensory epithelium to activate downstream signaling pathways like  
422 phagocytosis and resolution of inflammation that promotes restoration of noise-damaged ribbon synapses and  
423 hearing function.

424 Currently, there are no FDA-approved drugs or treatments for NICS that elicit regeneration of lost auditory  
425 nerves and replenish their synaptic connections with surviving hair cells and restore hearing. Therefore, there is  
426 a great need to identify novel molecules to develop therapeutic targets to restore synapses and hearing in NICS.  
427 Our findings have identified a novel immune pathway, fractalkine signaling axis and they provide a robust proof-  
428 of-principle that sFKN can be developed as an immunotherapy that would be beneficial for patients with NICS,  
429 and potentially for other patients with cochlear synaptopathy that affect understanding of speech or central  
430 auditory processing disorders. Clinically, sFKN could be administered either alone or together with potential  
431 neurotrophins like NT-3 or BDNF which partially restore synapses in animal models of NICS (7-11). Due to the  
432 anti-inflammatory and regulating macrophage activation properties, sFKN can also be tested against other forms  
433 of sensorineural hearing loss such as age-related hearing loss and cochlear synaptopathy that are associated  
434 with inflammation, vascular damage, and macrophage dysregulation (89).



435 *Limitations of the study:* The present study did not examine the pharmacological potency (dose response),  
436 dosage, therapeutic window, and toxicology of soluble FKN in NICS. Additionally, the effect of sFKN in  
437 modulating macrophage density, morphological activation (transformative index), phagocytic index and  
438 inflammation in NICS was not undertaken in the present study. Before sFKN can be used clinically for noise-  
439 induced cochlear synaptopathy and hidden hearing loss these studies are warranted.

## 441 **MATERIALS AND METHODS**

442 **Mice.** Study used in-house bred age-matched FKN wild-type mice (hereafter denoted as FKN WT) (Jackson  
443 Laboratories, Bar Harbor, Maine, stock number, 000664) and CX<sub>3</sub>CL1<sup>-/-</sup> or FKN knockout mice (hereafter  
444 denoted as FKN KO) (90), gifted by Dr. Astrid Cardona, University of Texas, Department of molecular  
445 Microbiology and Immunology, College of sciences, San Antonio, Texas) on a C57BL/6J background. Efforts  
446 were made to minimize animal suffering and to reduce the numbers of animals used. Animals were housed  
447 under a 12- hour light/12- hour dark cycle and fed ad libitum, unless specified. All aspects of animal care,  
448 procedure and treatment were carried out according to guidelines of the Animal Studies Committee of Creighton  
449 University, Omaha, NE and Rutgers University, Piscataway, NJ.

451 **Chemicals and peptides.** Chemicals and peptides were purchased from Fisher Scientific, Sigma-Aldrich or  
452 R&D systems until mentioned otherwise. Poloxamer 407 (Sigma-Aldrich, cat. #16758), recombinant control  
453 peptide (R&D systems, cat. #4460, Accession # P01863) is mouse melanoma cell line, NS0-derived mouse  
454 IgG2A protein of 26.7 kDa and 232 amino acids, recombinant full length membrane-bound Fractalkine (R&D  
455 systems, cat. #472-FF, Accession # O35188) is sf21 (baculovirus)-derived mouse CX3CL1/Fractalkine protein  
456 of 34 kDa and 312 amino acids and recombinant soluble Fractalkine (R&D systems, cat. #571-MF, Accession#  
457 AAB71763) is *E. coli*-derived mouse CX3CL1/Fractalkine peptide from amino acid 25 to 105 of 9.3 kDa and 80  
458 amino acids.

460 **Transtympanic (TT) Injection.** Lyophilized powders of the peptides indicated above were reconstituted with  
461 sterile 1xPBS, pH 7.4 (Fisher Scientific, cat. #BP661-10) to an equimolar stock concentration, aliquoted and

462 stored at -80°C until needed for experiment. Immediately before the TT injection, aliquots were mixed with an  
463 equal volume of sterile 18% poloxamer 407 hydrogel and placed on ice to maintain the fluidity and to prevent  
464 gel formation. The poloxamer hydrogel is liquid at room temperature or below, allowing TT injection, but  
465 transitions to a gel at body temperature, providing a prolonged residence time in the middle ear (91). Mice were  
466 anesthetized with an intraperitoneal injection of Ketamine/Xylazine (Patterson Veterinary) cocktail (100 and 20  
467 mg/kg, respectively; dose: 0.1 ml/20 gm body weight), following procedures described in our previous  
468 publications (12). Anaesthetized mouse's ear was brought under the focus of a stereo dissection microscope  
469 (Vermont Optechs, Inc., Maine, USA). A speculum was placed in the outer ear. Carefully an exhaust hole was  
470 made in pars tensa of the tympanic membrane using 1 ml insulin syringe needle (Excel, cat. #26029). The  
471 injection hole of ~ 0.5mm was made ~90° angle opposite to the exhaust hole below the pars flaccida. Vehicle  
472 or peptide mixed with vehicle was injected by inserting the needle (31 gauge, Hamilton, cat. #7762-04) attached  
473 to a 10 µl Hamilton syringe (Hamilton, cat #) into the injection hole and the content were slowly plunged near  
474 the round window. The mouse was placed on a heating pad with the injected ear up until it recovered from the  
475 anesthesia.

476  
477 **Study design.** FKN WT and KO mice of both sexes at 5-6 weeks of age were used for study. To avoid the  
478 saturation effect of the cochlear endogenous FKN ligand, FKN KO mice were used to test the efficacy of FKN  
479 isoforms in restoration of ribbon synapses after NICS. Following assessment of baseline hearing sensitivity at  
480 1-day pre noise exposure (PNE), mice were exposed to a synaptopathic noise level of 93 decibel sound pressure  
481 level (dB SPL) at 8-16 kilohertz (kHz) for 2 hours (13). Degree of hearing loss was measured at 1-day post noise  
482 exposure (DPNE), immediately after which the noise exposed FKN WT mice were TT injected with the sterile  
483 vehicle (18% Poloxamer 407 hydrogel). Noise exposed FKN KO mice were injected either with vehicle (18%  
484 Poloxamer 407 hydrogel), control peptide, membrane-bound FKN peptide (mFKN) or soluble FKN peptide  
485 (sFKN). All peptides were TT injected at a concentration of 50 ng/µl based on the reported EC<sub>50</sub> in CNS studies  
486 (43-53) in a total injection volume of 5 µl (total peptide delivered = 250 ng) and all TT injections were performed  
487 once and unilaterally. Degree of recovery of hearing thresholds shifts was measured at 14-15 DPNE, following  
488 which the mice were euthanized and isolated cochleae were microdissected and processed for various assays

489 indicated below. Age-matched unexposed and uninjected FKN WT and FKN KO mice served as controls  
490 (Fig.1A).

491  
492 **Noise exposure.** Awake, unrestrained mice were exposed for 2 hours to an octave band-noise (8-16 kHz) at  
493 graded noise levels (93 dB SPL). Noise exposures were performed in a foam-lined, single-walled soundproof  
494 room (WhisperRoom Inc.,TN). Briefly, mice were placed singly or in pairs in modified subdivided cages (food,  
495 water, bedding removed) positioned up to two cages at once directly under an exponential horn (JBL). Noise  
496 was generated digitally using custom Labview routines and a Lynx E22 sound card (running on a PC), filtered  
497 pure tone (8–16 kHz), and amplified (D-150A power amplifier, Crown Audio) that drive the speaker through an  
498 exponential horn (JBL). Prior to each exposure, the noise was calibrated to target SPL using a quarter-inch  
499 condenser microphone (PCB). Sound pressure levels varied by  $\pm 1$  dB across the subdivisions in the cage.  
500 Unexposed mice served as age-matched sham controls.

501  
502 **Electrophysiological recordings.** Auditory brainstem responses (ABR) and distortion product otoacoustic  
503 emissions (DPOAE) were measured by an observer who was “blinded” to the experimental conditions of each  
504 animal. Mice were anesthetized with an intraperitoneal injection of Ketamine/Xylazine (Patterson Veterinary)  
505 cocktail (100 and 20 mg/kg, respectively; dose: 0.1 ml/20 gm body weight), following procedures described in  
506 our previous publications (12). ABRs thresholds and DPOAEs levels were measured prior to noise exposure, at  
507 1 day after noise exposure (to verify degree of hearing loss) and at 2 weeks after noise exposure, to quantify  
508 recovery of hearing.

509 ABRs: Anesthetized mice were placed on a heating pad set at 37°C and eyes were lubricated with an ophthalmic  
510 ointment (Artificial Tears) to avoid drying due to anesthesia. Subcutaneous needle electrodes were placed  
511 behind the right pinna (reference) and vertex (active). A ground electrode was placed near the tail of the mouse.  
512 A TDT Multi Field (MF1) speaker was set at 10 cm from the right pinna and calibrated with PCB ¼” free field  
513 calibration microphone before recordings. Stimuli of 5-ms tone pips (0.5 ms  $\cos^2$  rise-fall) were delivered at 21/s  
514 with alternating stimulus polarity using an RZ6-A-P1 Bioacoustic system and Medusa4Z pre-amplifier (Tucker-

515 Davis Technologies, Alachua, FL). Recorded electrical responses at a sampling rate of 12 kHz were filtered  
516 (300 Hz to 3 kHz) and averaged using BioSigRZ software (Tucker-Davis Technologies, Alachua, FL). The sound  
517 level was decreased in 5-dB steps from 100 dB Sound Pressure Level (SPL) down to 10 dB SPL. At each sound  
518 level, 512-1024 responses were averaged, and response waveforms are discarded as artifacts if the peak-to-  
519 peak voltage exceeded 15  $\mu$ V. Thresholds at 8.0, 11.2, 16.0, 22.6, and 32.0 kHz were determined by a single  
520 observer who noted the lowest sound level at which a recognizable Peak I (PI) waveform could be obtained.  
521 Waveforms were confirmed as auditory-evoked responses by their increasing latency and decreasing amplitude  
522 as the intensity of the stimulus is lowered. ABR thresholds refer to the lowest SPL that can generate identifiable  
523 electrical response waves. These threshold values (actual or assigned) were used to calculate the mean ABR  
524 thresholds at each stimulus frequency. Threshold shifts were calculated by subtracting baseline thresholds from  
525 thresholds at 1 day and 15 days post noise exposure at all the stimulus frequencies.

526 *Input/output (I/O) neural response*: Methods followed those described in Kaur et al., 2019 (12). Briefly, ABR  
527 Peak I component was identified and the peak to trough amplitudes and latencies were computed by off-line  
528 analysis of stored ABR waveforms. ABR Peak I amplitude and latency versus-stimulus level (ABR I/O) data  
529 were computed at 8, 16, 22.6 and 32 kHz for sound levels ranging from 100 dB SPL up to the hearing thresholds,  
530 unless otherwise specified.

531 *DPOAEs*: Anesthetized mice were placed on a heating pad set at 37°C and eyes were lubricated with an  
532 ophthalmic ointment (Artificial Tears) to avoid drying due to anesthesia. Stimuli were presented at 5–40 kHz and  
533 delivered to the right ear by a custom coupling insert RZ6-A-P1 bioacoustic system (Tucker-Davis Technologies,  
534 Alachua, FL). Electrostatic loudspeakers (EC1) were calibrated with ER10B+ Etymotic low noise probe and  
535 microphone before recordings. Distortion product (DP) grams (2f1-f2) were obtained for f2 ranging from 5 to 40  
536 kHz, with a frequency ratio of f2/f1 of 1.2 and L1–L2 = 10 dB. Recordings were performed using BioSigRZ  
537 software (Tucker-Davis Technologies, Alachua, FL). Following ABR/DPOAE recordings, animals were placed  
538 on a heating pad at 37°C and monitored until they regained activity and then returned to animal research facility.

539  
540 **PLX5622-induced depletion of cochlear macrophages.** To determine whether macrophages are necessary  
541 for sFKN-mediated synaptic repair after NICS, FKN WT mice were fed on either standard nutritionally-complete

542 rodent diet (AIN-76A formulation, referred to as control chow) or on AIN-76A chow that contained 1.2 gm/kg of  
543 PLX5622 (hemifumarate salt, 99.30% purity, cat. # HY-114153, MedChemExpress, NJ, referred to as PLX5622  
544 chow). PLX5622 is a selective antagonist of Colony Stimulating Factor 1 Receptor (CSF1R), that regulates  
545 macrophage development, survival, and maintenance (92). Both control and PLX5622 chows were formulated,  
546 irradiated, and supplied by Research Diets, Inc., New Brunswick, NJ. Following 2 weeks on respective chows  
547 which led to a robust elimination of cochlear resident macrophages, both control and PLX5622 fed FKN WT  
548 mice were exposed to noise after recording the baseline hearing sensitivity followed by the TT injection of either  
549 vehicle or sFKN peptide at 1 DPNE, and the special chows were maintained until the end of the experiment for  
550 sustained macrophage depletion. Hearing function was assessed again at 15 DPNE followed by euthanasia,  
551 and processing of isolated cochleae for synaptic immunolabeling. Feeding mice with PLX5622 chow for 15 days  
552 does not affect the normal hearing sensitivity, as shown in our previous work (13).

553  
554 **Tissue harvesting and processing.** Mice were deeply anesthetized with lethal doses of pentobarbital sodium  
555 (Trade Name-Fatal Plus, Patterson Veterinary). Prior to respiratory arrest, mice were perfused by transcardiac  
556 route with phosphate buffered saline (PBS) (Fisher Scientific, cat. # BP661-10) or 4% paraformaldehyde (Fisher  
557 Scientific, cat. # 50980495) in 0.1 M phosphate buffered solution and temporal bones were harvested. For  
558 fluorescent immunolabeling of cochlear synapses, excised temporal bones were post fixed in 4%  
559 paraformaldehyde for 20 minutes on ice and decalcified in 0.1 M ethylenediaminetetraacetic acid (EDTA, Fisher  
560 Scientific, cat. # AC327205-000) overnight for ~16 hours. For macrophage immunolabeling in cochlear mid-  
561 modiolar cryosections, temporal bones were fixed for 3-4 hours at room temperature and decalcified for 3-5  
562 days. The temporal bones were rinsed thrice with PBS and appropriate fluorescent immunohistochemistry was  
563 performed.

564  
565 **Immunohistofluorescence.** Microdissected cochlear whole mounts or frozen mid-modiolar cross sections (20  
566  $\mu\text{m}$ ) were rinsed with PBS (Fisher scientific, cat. # BP661-10) at least 3 times and incubated at room temperature  
567 for 2 h in blocking solution containing 5% normal horse serum (Sigma-Aldrich, Cat. # H0146) in 0.2% Triton X-  
568 100 (Sigma-Aldrich, cat. # A16046AP) in PBS. For synaptic immunolabeling, cochlear microdissected whole

569 mounts were incubated overnight at room temperature with combinations of the following primary antibodies:  
570 CtBP2 mouse (BD Biosciences, cat. # 612044; RRID:AB\_399431; 1:200), GluA2 mouse (EMD Millipore, cat. #  
571 AB1506; RRID:AB\_11212990; 1:100), Myosin 7a rabbit (Proteus Biosciences, cat. # 25-6790;  
572 RRID:AB\_2314838; 1:500). For macrophage and neuron immunolabeling, cochlear frozen mid-modiolar cross  
573 sections or whole mounts were incubated overnight at room temperature with combinations of following primary  
574 antibodies: goat anti-CD45 (R&D Systems, catalog # AF114; RRID:AB\_442146; 1:100), mouse anti-  
575 Neurofilament 165 (NF-H) (Developmental Studies Hybridoma Bank, cat. # 2H3C, 1:100) and mouse anti-Tuj1  
576 (Covance, cat. #MMS-435P, 1:500). Following incubation with primary antibodies, specimens were rinsed 5  
577 times in PBS and treated for 2 h at room temperature in species-specific secondary antibodies conjugated to  
578 either DyLight 405 (1:500, Jackson ImmunoResearch Laboratories Inc.), or AlexaFluor-488, -546, -555, or -647  
579 (1:500; Invitrogen, Life Technologies). Tissue was mounted in glycerol:PBS (9:1) and coverslipped before  
580 confocal imaging. Tissue samples were batch processed using the same reagent solutions for all experimental  
581 groups.

582  
583 **Confocal Imaging.** Three- or four-color fluorescence imaging was performed using a Zeiss LSM 700 laser  
584 scanning confocal microscope (Carl Zeiss Microscopy 700, Jena, Germany). Z-series images using 5x, 10x, 20x,  
585 40x or 63x objectives were obtained. Image processing and quantitative analyses were performed using IMARIS  
586 (version 9.9.0, Oxford Instruments) and Volocity 3D image (version 6.5.1, PerkinElmer) software.

587  
588 **Synapse count.** Two to three confocal z-stacks were obtained using a high-resolution oil immersion objective  
589 (63x with 1.4 numerical aperture) and a digital zoom of 1.5 from apical, middle, and basal regions per cochlear  
590 whole mount. Each z-stack spanned the entire synaptic pole of 8-10 IHCs in the z-dimensions, with z-step-size  
591 of 0.3  $\mu\text{m}$ , from the apical portion of the IHC to nerve terminal in the habenula perforata region. IMARIS was  
592 used for 3D analysis of individual and juxtaposed/paired pre- and postsynaptic counts. Thresholds for all the  
593 channels were adjusted in such a way the background is reduced without losing any prominent fluorescence and  
594 two close fluorescent punctae are not merged. Total CtBP2 punctae, total GluA2 punctae and paired CtBP2 and



595 GluA2 fluorescence surface were counted per image. Total counts were divided by the number of surviving IHC  
596 to report CtBP2 punctae per IHC, GluA2 punctae per IHC and paired ribbon synapses per IHC.

597  
598 **Macrophage count.** To assess macrophages per 100  $\mu\text{m}$  of sensory epithelium, CD45-labeled macrophages  
599 were counted from 40X objective images taken from the apex, middle and basal region of cochlear whole mounts  
600 (16).

601  
602 **ELISA.** Protein extracted from cochlear lysate was estimated using BCA kit (Thermo Scientific, cat. # 23225).  
603 Level of cochlear endogenous FKN (R&D systems, #DY472) or TT injected (exogenous) sFKN peptide  
604 (Invitrogen, cat. #EMCX3CL1) was estimated from 50  $\mu\text{g}$  of cochlear protein lysate by following the  
605 manufacture's protocol. Briefly, cochlear protein lysates (samples) were loaded along with the sFKN standard in  
606 a 96 well plate coated with capture antibody. Plate was incubated for 150 min at room temperature. After  
607 washing, the wells were equally treated with binding antibody, followed by biotin conjugate, streptavidin-HRP  
608 and TMB substrate. The yellow color developed at the end point was read at 450 nm using Varioskan LUX  
609 multimode plate reader (Thermo Fisher scientific, #VLBL0TD2). Concentration of sFKN in cochlear protein lysate  
610 was determined using the linear equation derived from the standard curve (Fig. S12A).

611  
612 **Matrix Assisted Laser Desorption Ionization-Time of Flight-Mass Spectrometry (MALDI-TOF-MS).**

613 Cochlear perilymph collected ( $\sim 0.5 \mu\text{L}$ ) at different time points after TT injection of sFKN in FKN KO mice were  
614 diluted with 4.5  $\mu\text{L}$  of mass spectrometry (MS) grade water (with 0.1% trifluoroacetic acid) to prepare final volume  
615 of 5  $\mu\text{L}$ . 1  $\mu\text{L}$  of each diluted perilymph sample were spotted on a MALDI stainless steel plate and 1  $\mu\text{L}$  insulin  
616 as internal standard (9 ng/  $\mu\text{L}$ ) along with 1  $\mu\text{L}$  of DHB matrix solution (40 mg/mL in acetonitrile: water 1:1 (0.1%  
617 TFA) were added on the same spot for each time point. For standard curve, sFKN peptide was dissolve in MS  
618 grade water (with 0.1% TFA) at 250 ng/  $\mu\text{L}$  and diluted sub-sequentially two times up to 0.48 ng/  $\mu\text{L}$ , spotted on  
619 the MALDI-plate in triplicate and then 1  $\mu\text{L}$  insulin as internal standard (9 ng/  $\mu\text{L}$ ) and 1  $\mu\text{L}$  of DHB matrix solution  
620 were added on each spot (Fig. S12B).

621 The samples were dried in room temperature. MALDI-Tof-mass spectroscopy experiments were performed in  
622 an Autoflex III MALDI-TOF/TOF mass spectrometer (Bruker Daltonics, Leipzig, Germany) equipped with a 200-  
623 Hz Smart beam laser and using the Flex control v.3.4 software. Mass data was collected with manual laser  
624 positioning. For each sample 10 spots were chosen, and 1000 laser shots were collected to obtain 10 spectra  
625 in linear positive mode. The IS1 voltage was 20 kV, the IS2 voltage was maintained at 18.97 kV, the lens voltage  
626 was 5.67 kV, and laser power was 95%. Sample rate and digitizer setting was set to 1.25 and detector gain was  
627 10x. Mass data were collected in the range 5000-14000 m/z. Mass accuracy was calibrated internally with spiked  
628 insulin, intensity of internal standard and sFKN was determined from each sample. Standard curve was prepared  
629 by plotting Intensity ratio of sFKN/ Insulin in Y axis and concentration of peptide in X-axis and fitting the data with  
630 linear equation (Fig. S12B). Mass of peptide in perilymph was then calculated from standard curve equation.

631

632 **Fluorescent conjugated sFKN peptide detection in the cochlea after TT injection.** Mouse sFKN Alexa Fluor-  
633 647 (Almac, #CAF-51, 9.9 kDa) was reconstituted in PBS and an equimolar amount to the unconjugated sFKN  
634 peptide (i.e., 50 ng/ $\mu$ l) was mixed with sterile Poloxamer 407 hydrogel and was TT injected in FKN WT mice.  
635 The cochlea and perilymph were isolated at 3 and 6 hours post injection. Midmodiolar cryosections of cochlea  
636 were processed for macrophage immunolabeling as described above and imaged using confocal microscope.  
637 The collected perilymph was made up to 50  $\mu$ l in 1xPBS and the fluorescence intensity or emission was  
638 measured at 647 nm using Varioskan LUX multimode plate reader (Thermo Fisher scientific, #VLBL0TD2).

639

640 **Luminex assay.** Luminex assay was performed to detect the protein levels of various cytokines in cochlear  
641 protein lysates using a custom-build multiplex panel as per the manufacturer's protocol (Thermo Fisher Scientific,  
642 catalog # PPX-26-MXPRMA9). Briefly, magnetic beads coated with target antibodies were added to the 96-well  
643 assay plate and washed thrice with wash buffer. Standards for 26 cytokine and chemokine analytes were mixed  
644 and serially diluted to generate standard curves. Cochlear protein lysates at a concentration of 50  $\mu$ g were used.  
645 Antigen standards, blanks, sample lysates were incubated with magnetic beads at room temperature at 500 rpm  
646 for 120 minutes in the dark. Then beads were washed thrice to remove the excess lysate/standard. 25  $\mu$ l of  
647 detection antibody was added and incubated in the dark for 30 minutes at room temperature. The beads were

648 washed thrice, 50  $\mu$ l of streptavidin-PE was added and incubated for 30 minutes in the dark at room temperature.  
649 Washed beads were re-suspended in 120  $\mu$ l of reading buffer and the plate was read using a Luminex<sup>TM</sup>  
650 100/200<sup>TM</sup> system (Thermo Fisher Scientific, FLEXMAP 3D). Acquired raw data were analyzed using 5PL  
651 algorithm offered by Thermo Fisher Scientific (Procartaplex Analysis App available online). Raw data file from  
652 the instrument were fed in the application and the lot numbers of standards were entered. By following the  
653 manufacturer's instruction, the application computes the concentration and displays the graph for individual  
654 analytes.

655  
656 **Statistical analyses.** All statistical analyses were performed using Prism GraphPad version 10.0.2. Values are  
657 expressed as mean  $\pm$  standard deviation (SD) across animals in each experimental group unless otherwise  
658 stated in the figure legends. Student t-test, or one- or two-way ANOVA was applied as appropriate. Significant  
659 main effects or interactions were followed by appropriate post hoc tests. Details on error bars, statistical analysis,  
660 numbers of mice, and experimental replicates can be found in results and figure legends. Results were  
661 considered statistically significant when probability (P-values) of the appropriate statistical test were less than or  
662 equal to the significance level, alpha ( $\alpha$ ) = 0.05.

## 663 664 **List of Supplementary Materials**

665  
666 Materials and Methods  
667

668 **Real time-quantitative polymerase chain reaction (RT-qPCR).** The total RNA was extracted with  
669 Biorad-PureZOL (#7326880). Isolated RNA was treated with DNase 1, RNase-free (Thermo Scientific,  
670 #ENO521). The first strand cDNA was synthesized from 1  $\mu$ g of total RNA using high-capacity RNA-to-  
671 cDNA kit (Applied Biosystems, #4388950). About 100ng/2 $\mu$ l of cDNA was used as a template for q-RT-  
672 PCR performed using TaqMan<sup>TM</sup> Fast Advanced Master Mix (Applied Biosystems, #4444557) in ABI  
673 PRISM 7500 Fast. Expression level was analyzed using TaqMan<sup>®</sup> Gene expression assay kit for  
674 CX3CR1 and GAPDH (Applied Biosystems, # 4331182). The PCR program was as follows: UNG

incubation at 50°C for 2 min, polymerase activation at 95°C for 10 min, Denaturation at 95°C for 15 sec, Anneal and extension at 60°C for 1min, total of 40 cycles were performed. Values were normalized to GAPDH and to the no noise exposed group and represented as fold change.

**Cochlear hair cell count.** Cochlear whole-mounts were processed for immunolabeling for hair cells. Both inner and outer hair cells were identified by their immunoreactivity for Myosin 7A. Hair cells were counted from the apical, middle, and basal region of the cochlea, as recorded in 20X objective images. Data was expressed as inner or outer hair cells in 300  $\mu$ m of sensory epithelium (16).

## Supplementary figures and figure legends

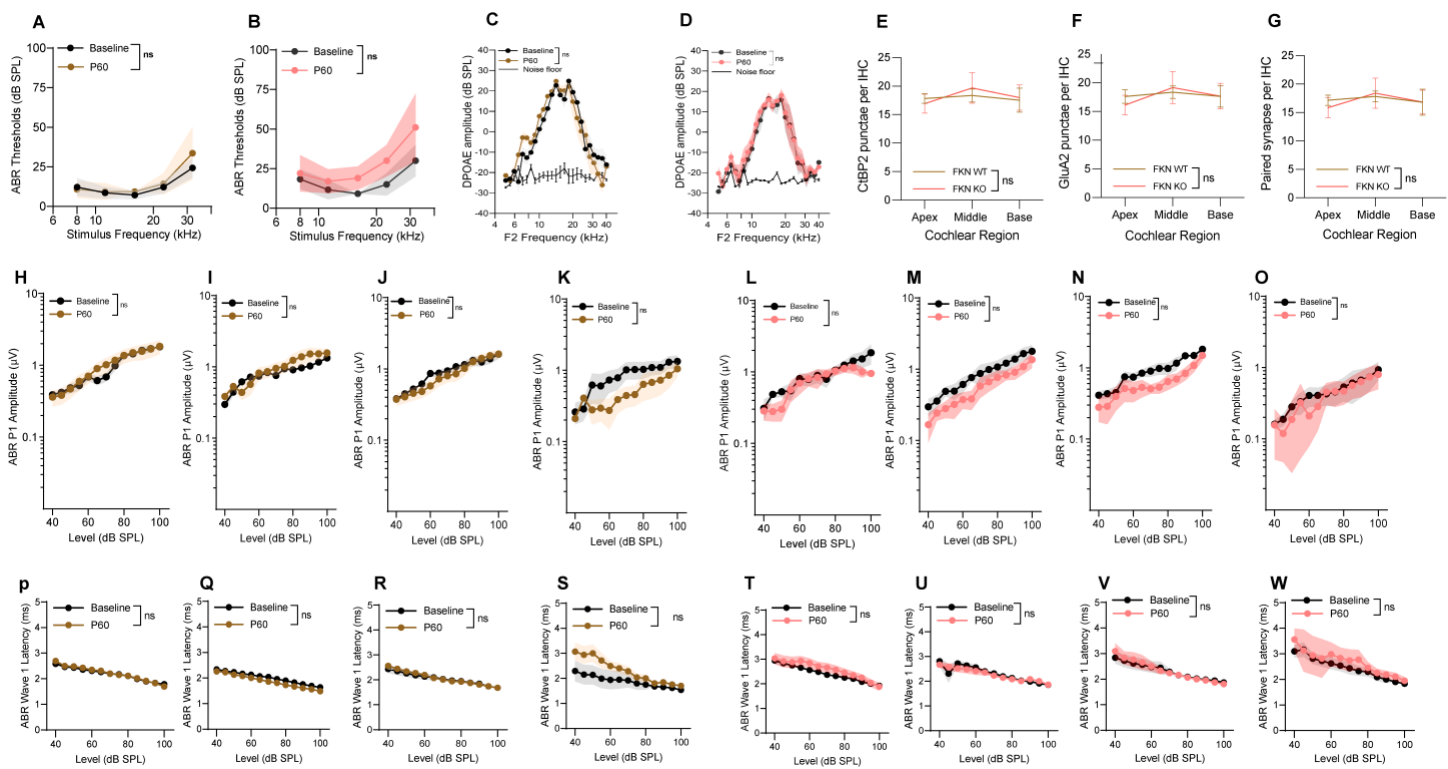

**Fig. S1. Gross hearing function in unexposed and uninjected FKN WT and FKN KO control mice.**

ABR thresholds at baseline (P45) and at experimental endpoint (P60) in (A) FKN WT and (B) FKN KO mice. 2-way ANOVA, Sidak's multiple comparisons. DPOAE levels at baseline (P45) and at experimental endpoint (P60) in (C) FKN WT and (D) FKN KO mice. 2-way ANOVA, Sidak's multiple

comparisons. (E) CtBP2 punctae, (F) GluA2 punctae and (G) paired ribbon synapses per IHC in FKN WT and FKN KO at P60. 2-way ANOVA, Dunnett's multiple comparisons test. ABR peak I amplitude at baseline (P45) and at experimental endpoint (P60) in FKN WT mice at (H) 8 kHz, (I) 16 kHz, (J) 22.6 kHz and (K) 32 kHz. ABR peak I amplitude at baseline (P45) and at experimental endpoint (P60) in FKN KO mice at (L) 8 kHz, (M) 16 kHz, (N) 22.6 kHz and (O) 32 kHz. ABR peak I latency at baseline (P45) and at experimental endpoint (P60) in FKN WT mice at (P) 8 kHz, (Q) 16 kHz, (R) 22.6 kHz and (S) 32 kHz. ABR peak I latency at baseline (P45) and at experimental endpoint (P60) in FKN KO mice at (T) 8 kHz, (U) 16 kHz, (V) 22.6 kHz and (W) 32 kHz. 1-way ANOVA, Tukey's multiple comparisons test (H-W). Values are mean  $\pm$  SD. ns, non-significant comparison between baseline (P45) and at experimental endpoint (P60). N=6-7 mice per genotype.

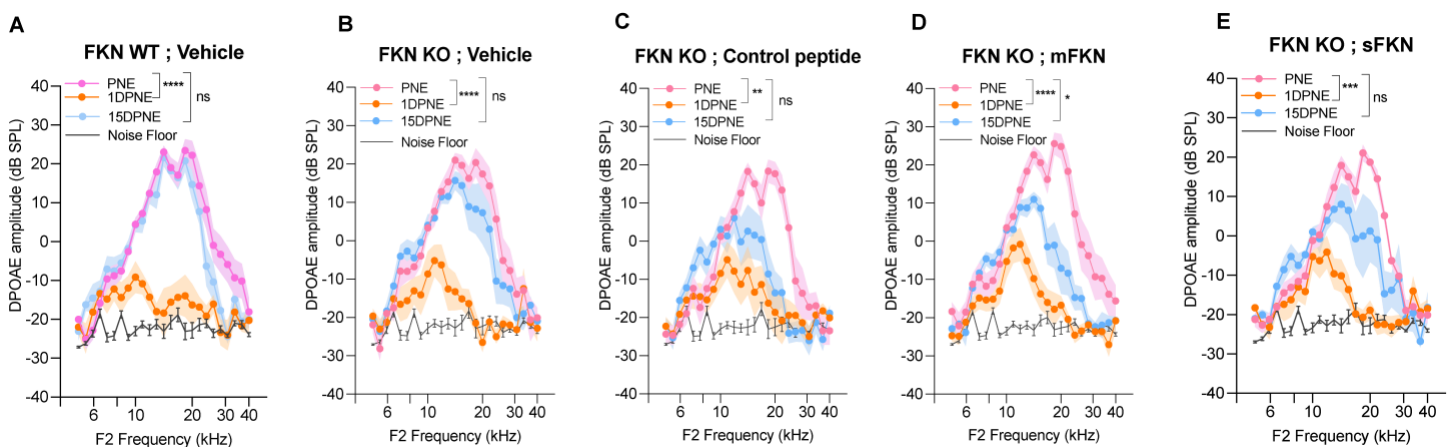

700

**Fig. S2. DPOAE amplitude at pre-noise exposure (PNE), 1 DPNE and 15 DPNE.** DPOAE levels in (A) FKN WT mice treated with vehicle (N=8), and in FKN KO mice treated with (B) vehicle (N=6) (C) control peptide (N=7) (D) membrane-bound FKN peptide (mFKN) (N=10) and (E) soluble FKN peptide (sFKN) (N=8). Values are means  $\pm$  SD. \*P < 0.05, \*\*P < 0.01, \*\*\*P < 0.001, \*\*\*\*P < 0.0001 and ns, non-significant at respective experimental time points. \*Represents comparison between PNE and 1DPNE or 15 DPNE as shown with parenthesis, 2-way ANOVA, Dunnett's multiple comparisons test.

707

708

709

□ FKN WT No noise exposed    □ FKN KO No noise exposed  
■ FKN WT Noise exposed       ■ FKN KO Noise exposed

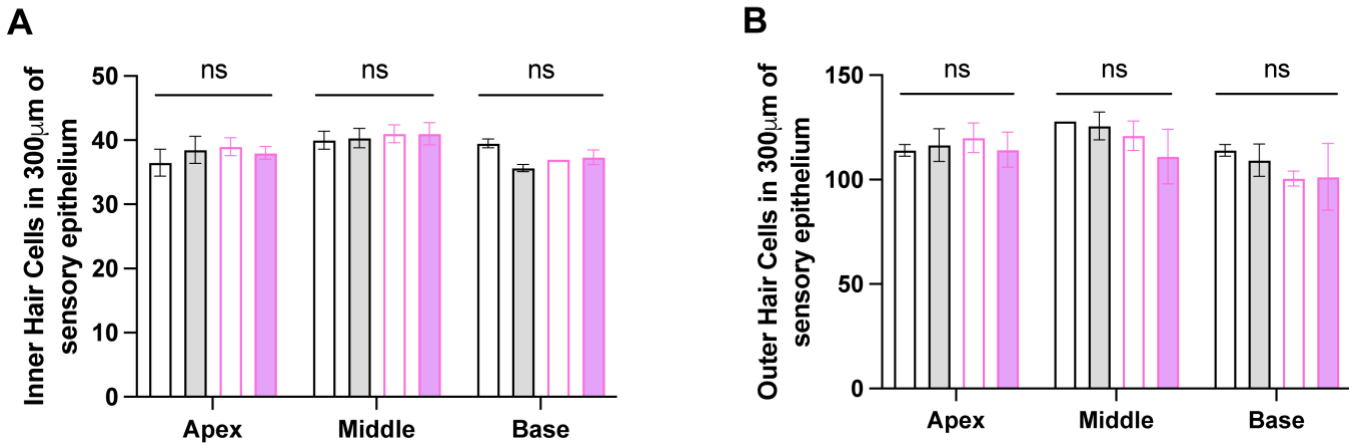

**Fig. S3. Hair cell density in FKN WT and FKN KO mice after NICS.** Density of cochlear (A) inner hair cells and (B) outer hair cells in no noise exposed (open bars) and noise exposed (filled bars) FKN WT and FKN KO mice shows no significant (ns) effect on hair cell survival between the genotypes. N=3 mice per genotype. 2-way ANOVA, Tukey's multiple comparison test.



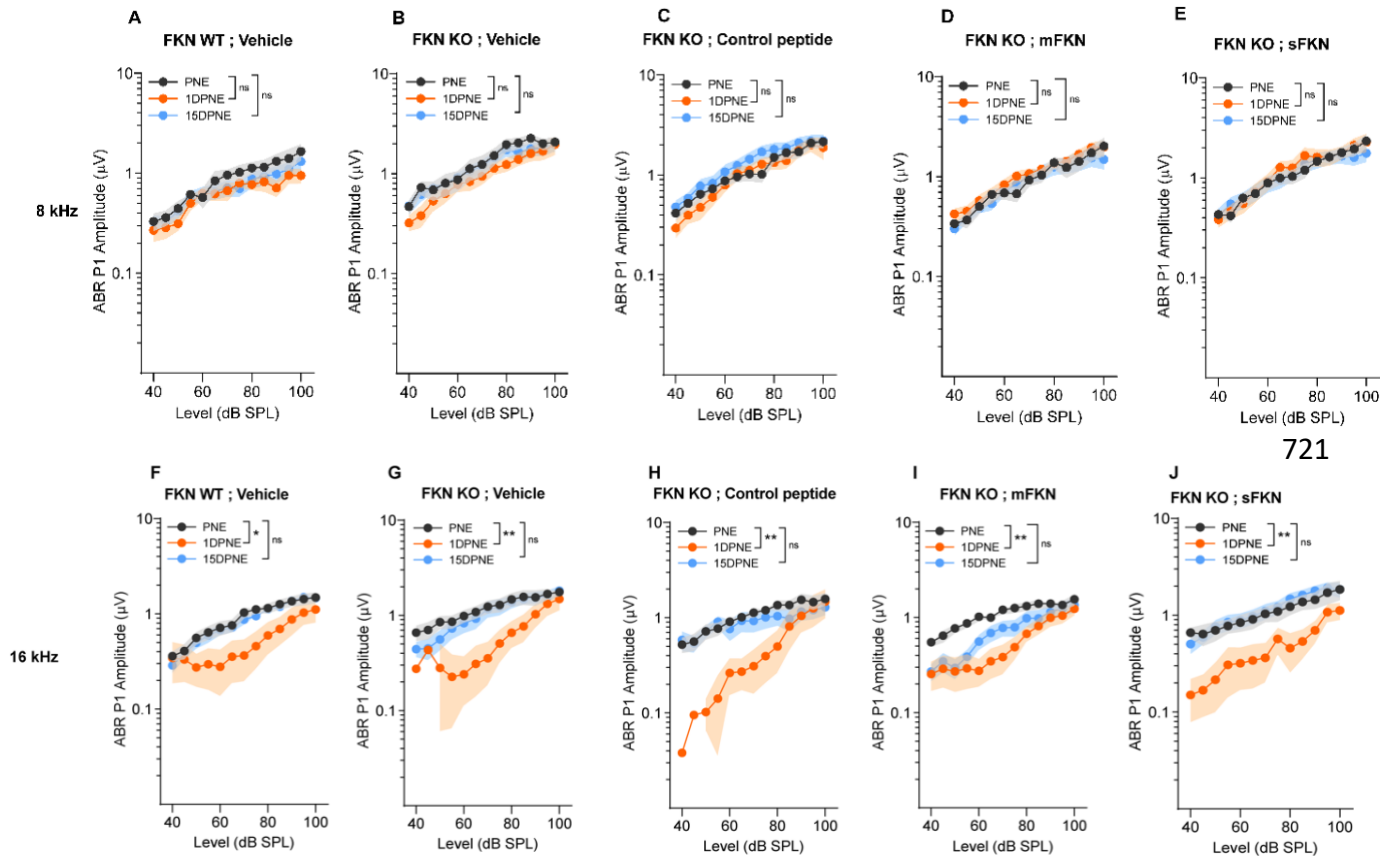

721

726 **Fig. S4. ABR Peak I amplitude at 8 kHz and 16 kHz.** ABR Peak I amplitudes at 8 kHz (A) FKN WT  
727 mice treated with vehicle (N=8), FKN KO mice treated with (B) vehicle (N=6) (C) control peptide (N=7)  
728 (D) membrane-bound FKN peptide (mFKN) (N=10) and (E) soluble FKN peptide (sFKN) (N=8). At 16  
729 kHz (F) FKN WT mice treated with vehicle (N=8), FKN KO mice treated with (G) vehicle (N=6) (H)  
730 control peptide (N=7) (I) membrane-bound FKN peptide (mFKN) (N=9) and (J) soluble FKN peptide  
731 (sFKN) (N=8). Values are means  $\pm$  SD. \*P < 0.05, \*\*P < 0.01, and ns, non-significant. \*Represents the  
732 comparison between the experimental time points as indicated with parenthesis. 1-way ANOVA,  
733 Tukey's multiple comparisons test.

734

735

736

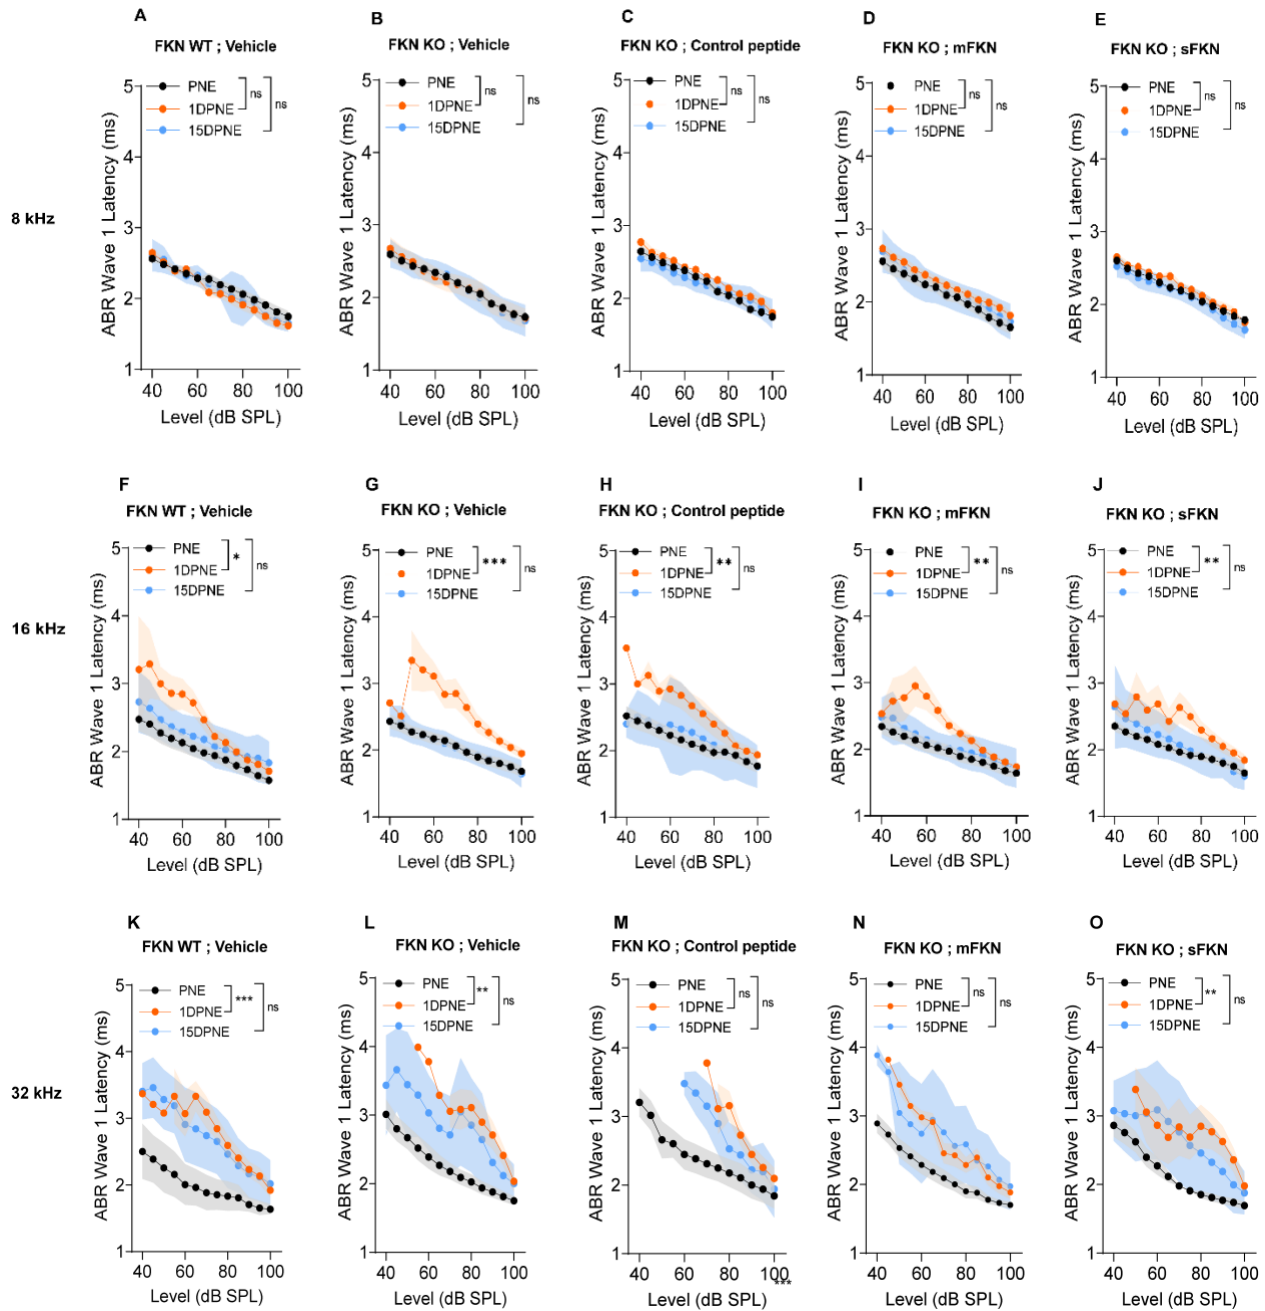

**Fig. S5. ABR Peak I latency at 8, 16, 32 kHz.** ABR Peak I latency at 8 kHz in (A) FKN WT mice treated with vehicle (N=8), and in FKN KO mice treated with (B) vehicle (N=6) (C) control peptide (N=7) (D) membrane-bound FKN peptide (mFKN) (N=10) and (E) soluble FKN peptide (sFKN) (N=8). At 16 kHz in (F) FKN WT mice treated with vehicle (N=8), and in FKN KO mice treated with (G) vehicle (N=6) (H) control peptide (N=7) (I) membrane-bound FKN peptide (mFKN) (N=9) and (J) soluble FKN peptide (sFKN) (N=8). At 32 kHz in (K) FKN WT mice treated with vehicle (N=8), and in FKN KO mice treated with (L) vehicle (N=6) (M) control peptide (N=7) (N) membrane-bound FKN peptide (mFKN) (N=10) and

747 (O) soluble FKN peptide (sFKN) (N=8). Values are means  $\pm$  SD. \*P < 0.05, \*\*P < 0.01, \*\*\*P < 0.001,  
748 and ns, non-significant. \*Represents the comparison between the experimental time points as indicated  
749 with parenthesis. 1-way ANOVA, Tukey's multiple comparisons test.

750

751

752

753

754

755

756

757

758

759

760

761

762

763

764

765

766

767

768

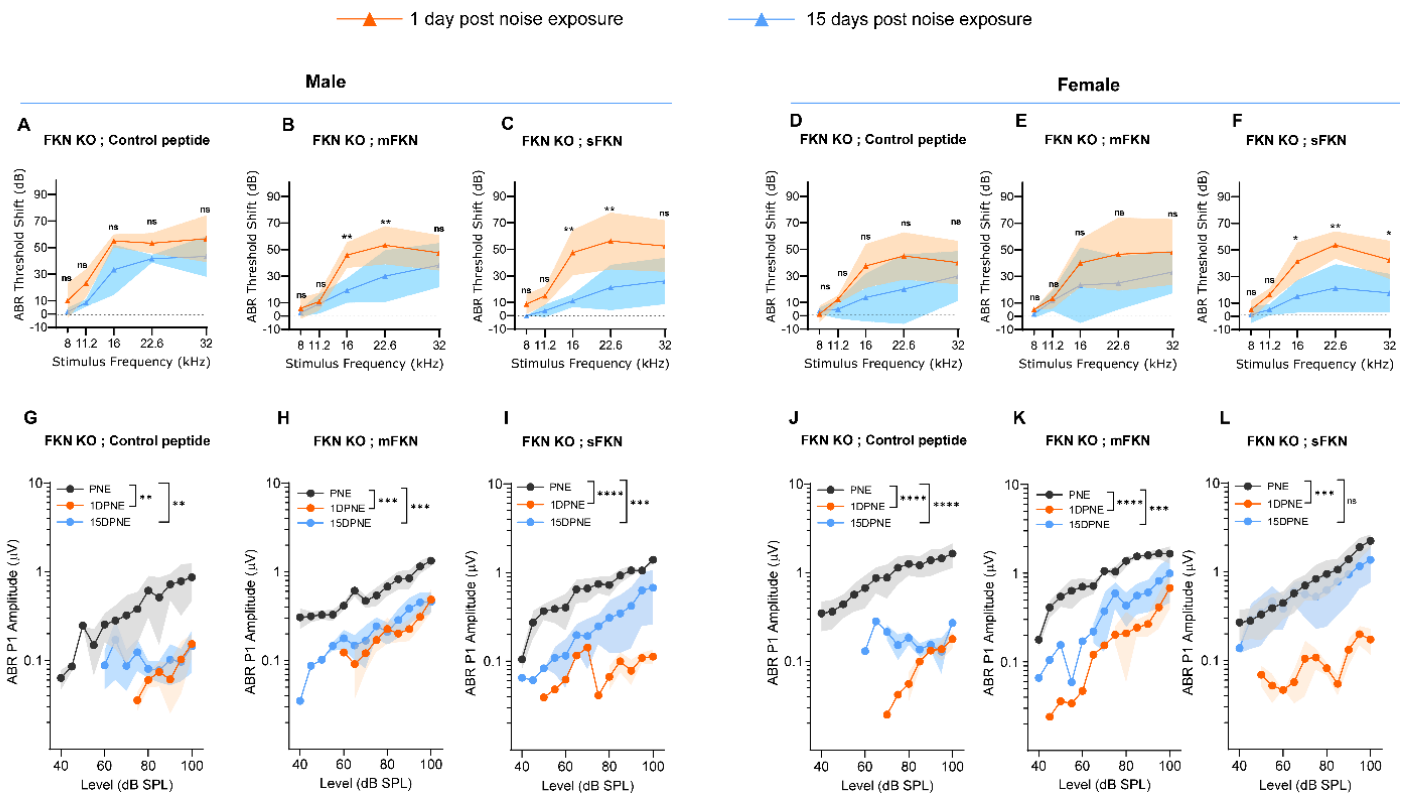

**Fig. S6. ABR threshold shifts and Peak I amplitudes in male and female FKN KO mice TT treated**

**with control peptide, mFKN and sFKN peptides.** ABR threshold shifts at 1 DPNE and 15 DPNE at

93 dB SPL from FKN KO male mice treated with (A) control peptide (N=3) (B) membrane-bound FKN

peptide (mFKN) (N=5) and (C) soluble FKN peptide (sFKN) (N=4). ABR threshold shifts at 1 DPNE and

15 DPNE at 93 dB SPL from FKN KO female mice treated with (D) control peptide (N=4) (E) membrane-

bound FKN peptide (mFKN) (N=3) and (F) soluble FKN peptide (sFKN) (N=4). 2-way ANOVA, Sidak's

multiple comparisons. \*Represents comparison between 1 DPNE and 15 DPNE. A-F, Dashed line

represent threshold shifts prior to noise exposure (baseline). ABR Peak I amplitudes at 32 kHz from

FKN KO male mice treated with (G) control peptide (N=3) (H) membrane-bound FKN peptide (mFKN)

(N=5) and (I) soluble FKN peptide (sFKN) (N=4). ABR Peak I amplitudes at 32 kHz from FKN KO female

mice treated with (J) control peptide (N=4) (K) membrane bound FKN peptide (mFKN) (N=5) and (L)

soluble FKN peptide (sFKN) (N=4). 1-way ANOVA, Tukey's multiple comparisons test. \*Represents the

comparison between the experimental time points as indicated with parenthesis. Values are means  $\pm$

SD. \*P < 0.05, \*\*P < 0.01, \*\*\*P < 0.001, \*\*\*\*P < 0.0001 and ns, non-significant.

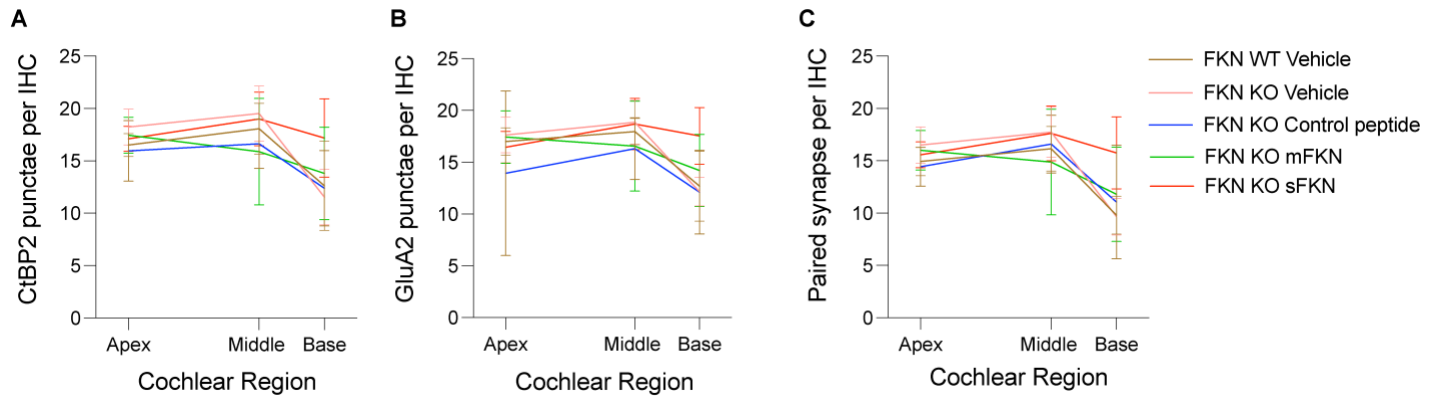

**Fig. S7. Pre- and postsynaptic punctae and paired synapses per IHC along the cochlear length at 15 DPNE.** (A) Absolute CtBP2 punctae per IHC, (B) Absolute GluA2 punctae per IHC and (C) Paired synapse density per IHC at apex, middle and base cochlear regions. Values are mean  $\pm$  SD. N= 5-9 mice per experimental group.

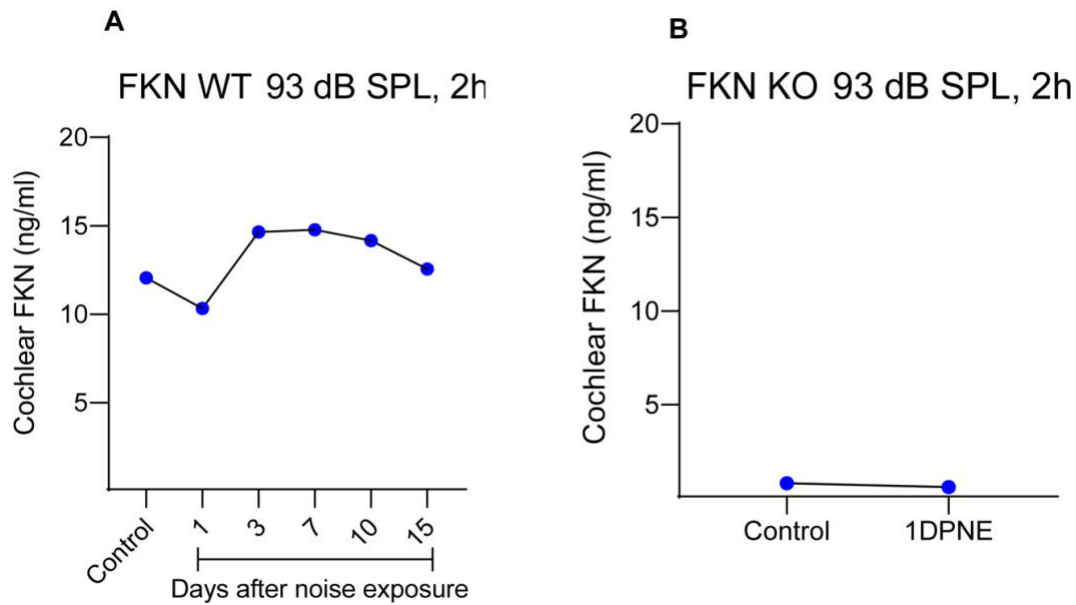

**Fig. S8. Cochlear endogenous soluble FKN levels after NICS.** ELISA based measurement of cochlear endogenous soluble FKN levels in (A) FKN WT mice and (B) FKN KO mice at different time points after NICS. Values are plotted as mean. Experiment was performed once. N=6 cochleae pooled from 3 different mice per time point per genotype to prepare protein lysates and each sample was run in triplicate. DPNE, days post noise exposure.



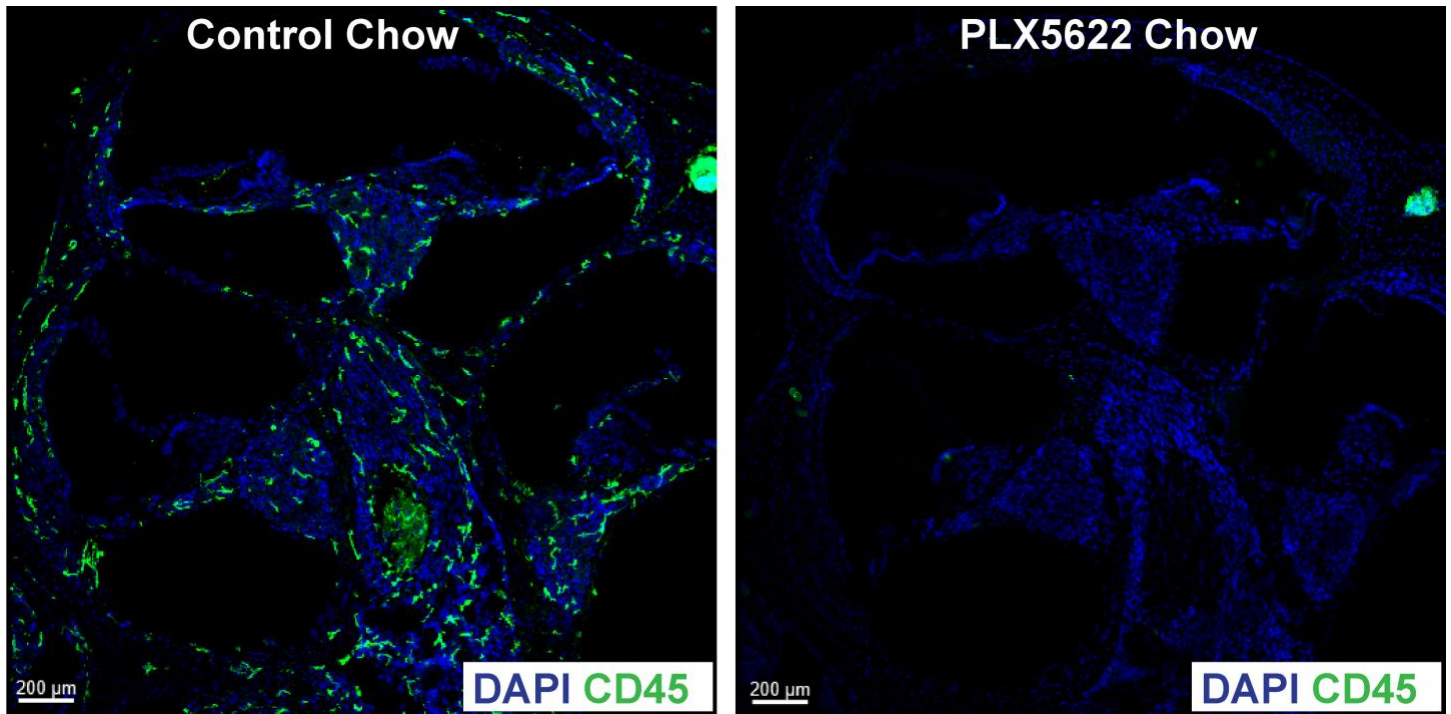

**Fig. S9. PLX5622-induced depletion of cochlear resident macrophages.** Representative images of cochlear mid-modiolar cross-sections from mature FKN WT mice fed on PLX5622 chow for 15 days show a robust depletion of cochlear resident macrophages (green, CD45 leukocytes) when compared to FKN WT mice fed on control chow without the PLX5622 compound for 15 days. Data is from same mice as shown in the main Fig. 5C-F. Also see reference number 13.

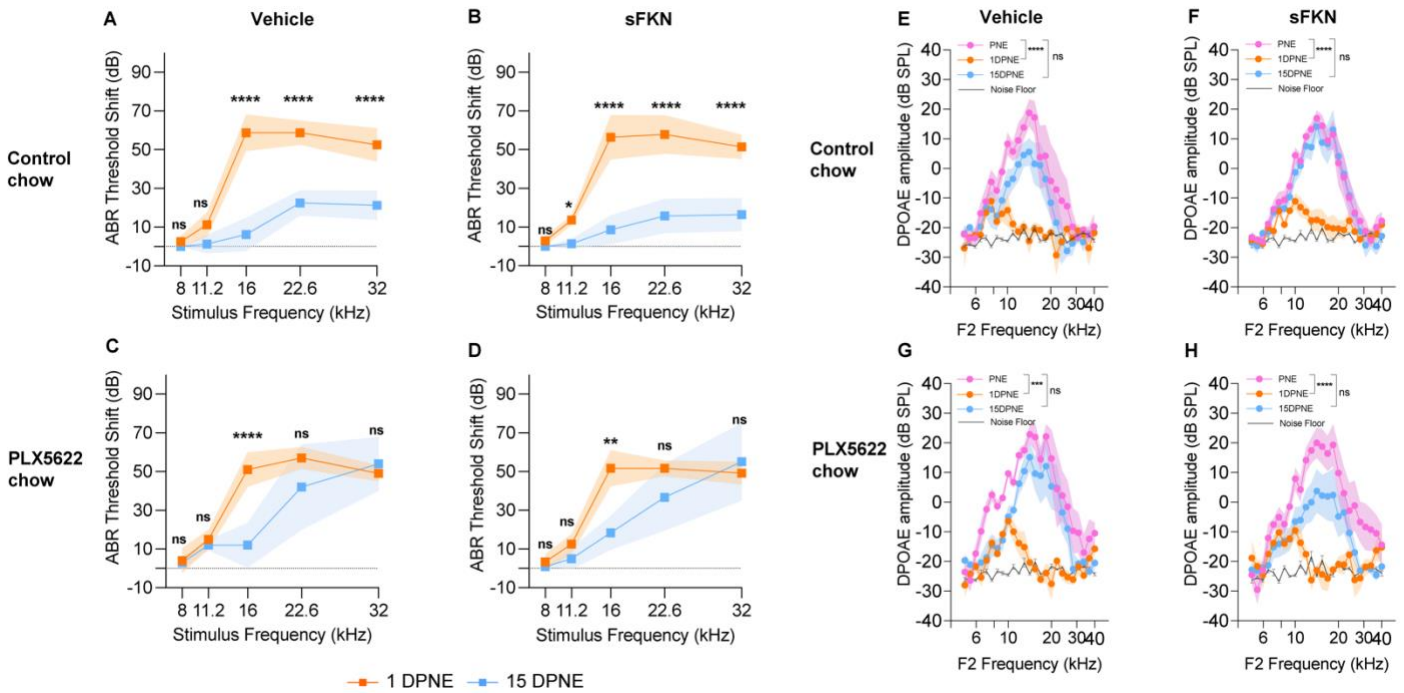

842 **Fig. S10. ABR thresholds shifts (A-D) and DPOEA levels (E-H) in vehicle- and sFKN-treated FKN**  
 843 **WT mice in the presence (control chow) or absence (PLX5622 chow) of cochlear resident**  
 844 **macrophages.** N=5-7 mice per experimental group. Values are means  $\pm$  SD. \*Represents comparison  
 845 between 1DPNE and 15 DPNE (A-D). \*Represents comparison between PNE and 1DPNE or 15 DPNE  
 846 as shown with parenthesis (E-H). 2-way ANOVA, Sidak's multiple comparisons. \*P < 0.05, \*\*P < 0.01,  
 847 \*\*\*P < 0.001, \*\*\*\*P < 0.0001 and ns, non-significant. Dashed line represent threshold shifts prior to  
 848 noise exposure (baseline, A-D).

849

850

851

852

853

854

855

856

857

858

### CX3CR1 mRNA in FKN WT mice

859

860

861

862

863

864

865

866

867

868

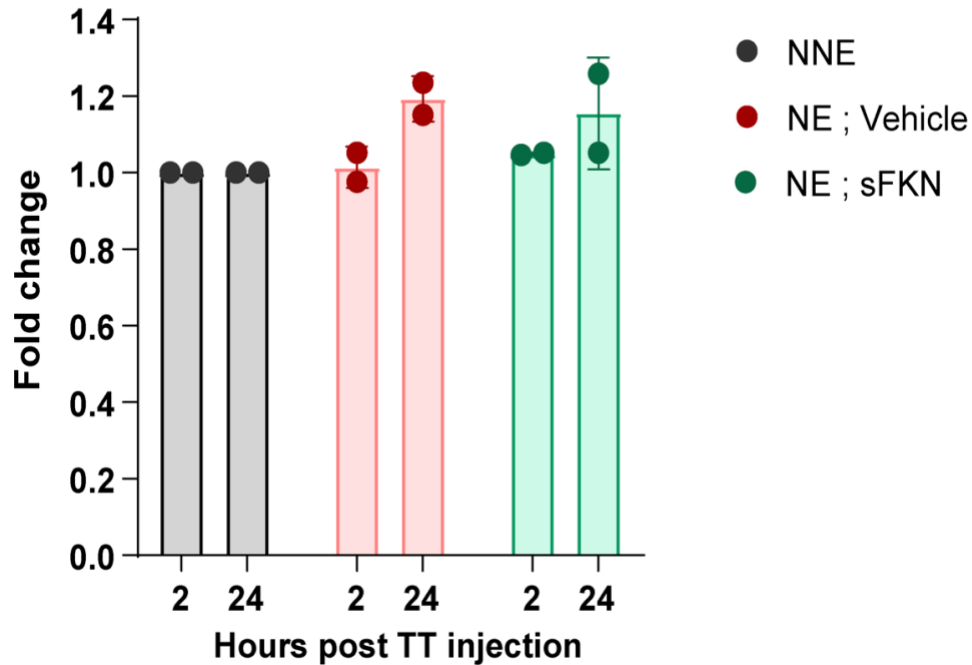

869

**Fig. S11. mRNA levels of cochlear CX<sub>3</sub>CR1 receptor.** CX<sub>3</sub>CR1 receptor mRNA measured by RT-qPCR in unexposed and noise exposed FKN WT mice after 2 and 24 hours of sFKN peptide TT injection. Values are mean ± SD. N=2 biological replicates per experimental group with 3 cochleae pooled from 3 different mice per group per biological replicate.

873

874

875

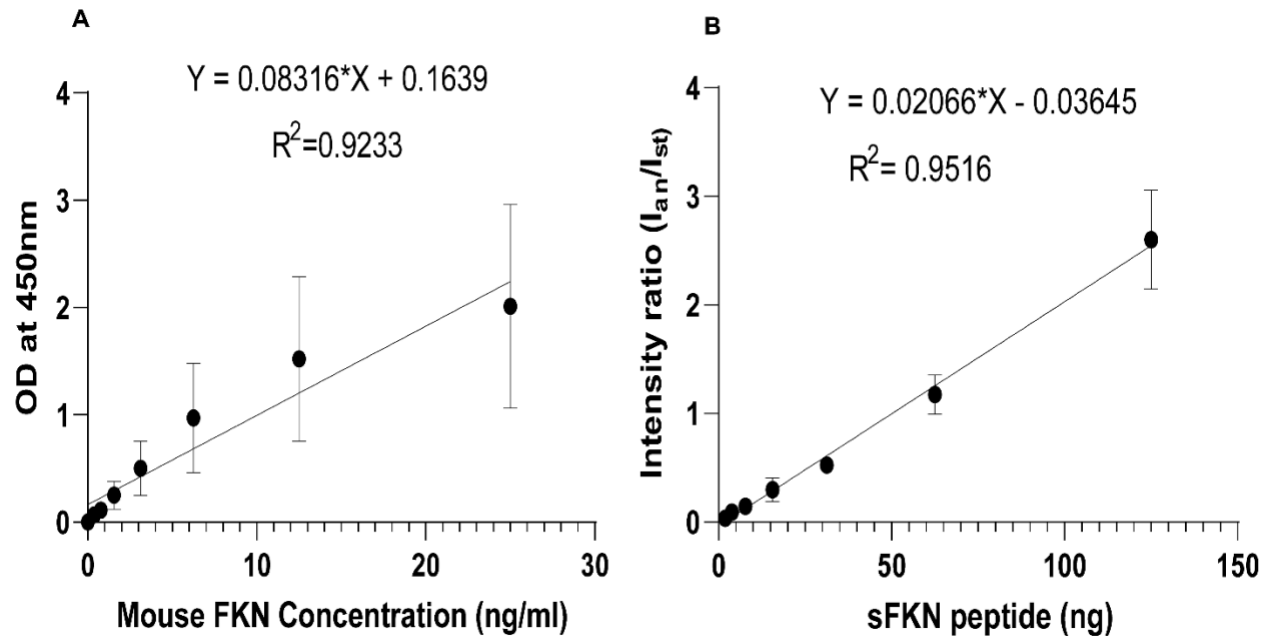

876  
877 **Fig. S12. Standard curves for sFKN peptide for (A) ELISA and (B) MALDI-TOF-MS to detect the**  
878 **concentration of transtympanically injected sFKN peptide in the cochlea.**

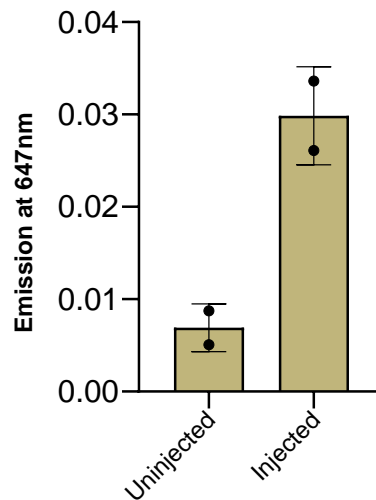

**Fig. S13. Mean fluorescence intensity of sFKN-Alexa Fluor 647 in cochlear perilymph at 3 hours after TT injection.** Values are mean  $\pm$  SD. N=2 FKN WT mice per experimental group.

## References

1. S. M. Theodoroff, M. S. Lewis, R. L. Folmer, J. A. Henry, K. F. Carlson, Hearing impairment and tinnitus: prevalence, risk factors, and outcomes in US service members and veterans deployed to the Iraq and Afghanistan wars. *Epidemiol Rev* **37**, 71-85 (2015).
2. M. Webster, D. B. Webster, Spiral ganglion neuron loss following organ of Corti loss: a quantitative study. *Brain Res* **212**, 17-30 (1981).
3. J. L. Puel, J. Ruel, C. Gervais d'Aldin, R. Pujol, Excitotoxicity and repair of cochlear synapses after noise-trauma induced hearing loss. *Neuroreport* **9**, 2109-2114 (1998).
4. S. G. Kujawa, M. C. Liberman, Adding insult to injury: cochlear nerve degeneration after "temporary" noise-induced hearing loss. *J Neurosci* **29**, 14077-14085 (2009).
5. M. C. Liberman, Noise-induced and age-related hearing loss: new perspectives and potential therapies. *F1000Res* **6**, 927 (2017).
6. N. F. Bramhall, D. Konrad-Martin, G. P. McMillan, S. E. Griest, Auditory Brainstem Response Altered in Humans With Noise Exposure Despite Normal Outer Hair Cell Function. *Ear Hear* **38**, e1-e12 (2017).
7. G. Wan, M. E. Gomez-Casati, A. R. Gigliello, M. C. Liberman, G. Corfas, Neurotrophin-3 regulates ribbon synapse density in the cochlea and induces synapse regeneration after acoustic trauma. *Elife* **3**, (2014).
8. J. Suzuki, G. Corfas, M. C. Liberman, Round-window delivery of neurotrophin 3 regenerates cochlear synapses after acoustic overexposure. *Sci Rep* **6**, 24907 (2016).
9. K. Hashimoto *et al.*, Protection from noise-induced cochlear synaptopathy by virally mediated overexpression of NT3. *Sci Rep* **9**, 15362 (2019).
10. H. Chen, Y. Xing, L. Xia, Z. Chen, S. Yin, J. Wang, AAV-mediated NT-3 overexpression protects cochleae against noise-induced synaptopathy. *Gene Ther* **25**, 251-259 (2018).
11. K. A. Fernandez *et al.*, Trk agonist drugs rescue noise-induced hidden hearing loss. *JCI Insight* **6**, (2021).
12. T. Kaur, A. C. Clayman, A. J. Nash, A. D. Schrader, M. E. Warchol, K. K. Ohlemiller, Lack of Fractalkine Receptor on Macrophages Impairs Spontaneous Recovery of Ribbon Synapses After Moderate Noise Trauma in C57BL/6 Mice. *Front Neurosci* **13**, 620 (2019).
13. V. Manickam *et al.*, Macrophages Promote Repair of Inner Hair Cell Ribbon Synapses following Noise-Induced Cochlear Synaptopathy. *J Neurosci* **43**, 2075-2089 (2023).



- 923 14. J. K. Harrison *et al.*, Role for neuronally derived fractalkine in mediating interactions between neurons  
924 and CX3CR1-expressing microglia. *Proc Natl Acad Sci U S A* **95**, 10896-10901 (1998).
- 925 15. K. W. Kim *et al.*, In vivo structure/function and expression analysis of the CX3C chemokine fractalkine.  
926 *Blood* **118**, e156-167 (2011).
- 927 16. T. Kaur *et al.*, Fractalkine Signaling Regulates Macrophage Recruitment into the Cochlea and Promotes  
928 the Survival of Spiral Ganglion Neurons after Selective Hair Cell Lesion. *J Neurosci* **35**, 15050-15061  
929 (2015).
- 930 17. W. Liu, M. Molnar, C. Garnham, H. Benav, H. Rask-Andersen, Macrophages in the Human Cochlea:  
931 Saviors or Predators-A Study Using Super-Resolution Immunohistochemistry. *Front Immunol* **9**, 223  
932 (2018).
- 933 18. S. Jung *et al.*, Analysis of fractalkine receptor CX(3)CR1 function by targeted deletion and green  
934 fluorescent protein reporter gene insertion. *Mol Cell Biol* **20**, 4106-4114 (2000).
- 935 19. K. Hirose, C. M. Discolo, J. R. Keasler, R. Ransohoff, Mononuclear phagocytes migrate into the murine  
936 cochlea after acoustic trauma. *J Comp Neurol* **489**, 180-194 (2005).
- 937 20. J. F. Bazan *et al.*, A new class of membrane-bound chemokine with a CX3C motif. *Nature* **385**, 640-644  
938 (1997).
- 939 21. L. S. Mizoue *et al.*, Molecular determinants of receptor binding and signaling by the CX3C chemokine  
940 fractalkine. *J Biol Chem* **276**, 33906-33914 (2001).
- 941 22. A. R. Stothert, T. Kaur, Innate Immunity to Spiral Ganglion Neuron Loss: A Neuroprotective Role of  
942 Fractalkine Signaling in Injured Cochlea. *Front Cell Neurosci* **15**, 694292 (2021).
- 943 23. T. Imai *et al.*, Identification and molecular characterization of fractalkine receptor CX3CR1, which  
944 mediates both leukocyte migration and adhesion. *Cell* **91**, 521-530 (1997).
- 945 24. K. J. Garton *et al.*, Tumor necrosis factor-alpha-converting enzyme (ADAM17) mediates the cleavage  
946 and shedding of fractalkine (CX3CL1). *J Biol Chem* **276**, 37993-38001 (2001).
- 947 25. C. A. Haskell, M. D. Cleary, I. F. Charo, Molecular uncoupling of fractalkine-mediated cell adhesion and  
948 signal transduction. Rapid flow arrest of CX3CR1-expressing cells is independent of G-protein activation.  
949 *J Biol Chem* **274**, 10053-10058 (1999).
- 950 26. P. Hermand *et al.*, Functional adhesiveness of the CX3CL1 chemokine requires its aggregation. Role of  
951 the transmembrane domain. *J Biol Chem* **283**, 30225-30234 (2008).
- 952 27. O. Berezovskaya, D. Maysinger, S. Fedoroff, The hematopoietic cytokine, colony-stimulating factor 1, is  
953 also a growth factor in the CNS: congenital absence of CSF-1 in mice results in abnormal microglial  
954 response and increased neuron vulnerability to injury. *Int J Dev Neurosci* **13**, 285-299 (1995).
- 955 28. J. Vinet *et al.*, Neuroprotective function for ramified microglia in hippocampal excitotoxicity. *J*  
956 *Neuroinflammation* **9**, 27 (2012).
- 957 29. A. R. Simard, S. Rivest, Neuroprotective effects of resident microglia following acute brain injury. *J Comp*  
958 *Neurol* **504**, 716-729 (2007).
- 959 30. U. B. Eyo, J. Peng, P. Swiatkowski, A. Mukherjee, A. Bispo, L. J. Wu, Neuronal hyperactivity recruits  
960 microglial processes via neuronal NMDA receptors and microglial P2Y12 receptors after status  
961 epilepticus. *J Neurosci* **34**, 10528-10540 (2014).
- 962 31. G. Kato *et al.*, Microglial Contact Prevents Excess Depolarization and Rescues Neurons from  
963 Excitotoxicity. *eNeuro* **3**, (2016).
- 964 32. O. Meucci, A. Fatatis, A. A. Simen, T. J. Bushell, P. W. Gray, R. J. Miller, Chemokines regulate  
965 hippocampal neuronal signaling and gp120 neurotoxicity. *Proc Natl Acad Sci U S A* **95**, 14500-14505  
966 (1998).
- 967 33. G. A. Chapman, K. Moores, D. Harrison, C. A. Campbell, B. R. Stewart, P. J. Strijbos, Fractalkine  
968 cleavage from neuronal membranes represents an acute event in the inflammatory response to  
969 excitotoxic brain damage. *J Neurosci* **20**, RC87 (2000).
- 970 34. K. Deiva *et al.*, Fractalkine reduces N-methyl-d-aspartate-induced calcium flux and apoptosis in human  
971 neurons through extracellular signal-regulated kinase activation. *Eur J Neurosci* **20**, 3222-3232 (2004).
- 972 35. C. Limatola *et al.*, Chemokine CX3CL1 protects rat hippocampal neurons against glutamate-mediated  
973 excitotoxicity. *J Neuroimmunol* **166**, 19-28 (2005).
- 974 36. D. Ragozzino *et al.*, Chemokine fractalkine/CX3CL1 negatively modulates active glutamatergic synapses  
975 in rat hippocampal neurons. *J Neurosci* **26**, 10488-10498 (2006).



- 976 37. C. Lauro *et al.*, Adenosine A1 receptors and microglial cells mediate CX3CL1-induced protection of  
977 hippocampal neurons against Glu-induced death. *Neuropsychopharmacology* **35**, 1550-1559 (2010).
- 978 38. C. Lauro *et al.*, Activity of adenosine receptors type 1 is required for CX3CL1-mediated neuroprotection  
979 and neuromodulation in hippocampal neurons. *J Immunol* **180**, 7590-7596 (2008).
- 980 39. R. Cipriani *et al.*, CX3CL1 is neuroprotective in permanent focal cerebral ischemia in rodents. *J Neurosci*  
981 **31**, 16327-16335 (2011).
- 982 40. M. Catalano *et al.*, CX3CL1 protects neurons against excitotoxicity enhancing GLT-1 activity on  
983 astrocytes. *J Neuroimmunol* **263**, 75-82 (2013).
- 984 41. C. Roseti *et al.*, Fractalkine/CX3CL1 modulates GABAA currents in human temporal lobe epilepsy.  
985 *Epilepsia* **54**, 1834-1844 (2013).
- 986 42. A. E. Cardona *et al.*, Control of microglial neurotoxicity by the fractalkine receptor. *Nat Neurosci* **9**, 917-  
987 924 (2006).
- 988 43. M. Noda *et al.*, Fractalkine attenuates excito-neurotoxicity via microglial clearance of damaged neurons  
989 and antioxidant enzyme heme oxygenase-1 expression. *J Biol Chem* **286**, 2308-2319 (2011).
- 990 44. M. M. Pabon, A. D. Bachstetter, C. E. Hudson, C. Gemma, P. C. Bickford, CX3CL1 reduces neurotoxicity  
991 and microglial activation in a rat model of Parkinson's disease. *J Neuroinflammation* **8**, 9 (2011).
- 992 45. J. M. Morganti *et al.*, The soluble isoform of CX3CL1 is necessary for neuroprotection in a mouse model  
993 of Parkinson's disease. *J Neurosci* **32**, 14592-14601 (2012).
- 994 46. K. R. Nash *et al.*, Fractalkine overexpression suppresses tau pathology in a mouse model of tauopathy.  
995 *Neurobiol Aging* **34**, 1540-1548 (2013).
- 996 47. K. R. Nash *et al.*, Fractalkine over expression suppresses alpha-synuclein-mediated neurodegeneration.  
997 *Mol Ther* **23**, 17-23 (2015).
- 998 48. W. Qin, Z. Li, S. Luo, R. Wu, Z. Pei, R. Huang, Exogenous fractalkine enhances proliferation of  
999 endothelial cells, promotes migration of endothelial progenitor cells and improves neurological deficits in  
000 a rat model of ischemic stroke. *Neurosci Lett* **569**, 80-84 (2014).
- 001 49. C. Limatola, R. M. Ransohoff, Modulating neurotoxicity through CX3CL1/CX3CR1 signaling. *Front Cell*  
002 *Neurosci* **8**, 229 (2014).
- 003 50. A. S. Mendiola *et al.*, Fractalkine Signaling Attenuates Perivascular Clustering of Microglia and  
004 Fibrinogen Leakage during Systemic Inflammation in Mouse Models of Diabetic Retinopathy. *Front Cell*  
005 *Neurosci* **10**, 303 (2016).
- 006 51. D. J. Finneran, D. Morgan, M. N. Gordon, K. R. Nash, CNS-Wide over Expression of Fractalkine Improves  
007 Cognitive Functioning in a Tauopathy Model. *J Neuroimmune Pharmacol* **14**, 312-325 (2019).
- 008 52. S. K. Wang, Y. Xue, P. Rana, C. M. Hong, C. L. Cepko, Soluble CX3CL1 gene therapy improves cone  
009 survival and function in mouse models of retinitis pigmentosa. *Proc Natl Acad Sci U S A* **116**, 10140-  
010 10149 (2019).
- 011 53. M. Gayen, M. R. Benoit, Q. Fan, J. Hudobenko, R. Yan, The CX3CL1 intracellular domain exhibits  
012 neuroprotection via insulin receptor/insulin-like growth factor receptor signaling. *J Biol Chem* **298**, 102532  
013 (2022).
- 014 54. M. M. A. de Almeida *et al.*, Fractalkine enhances oligodendrocyte regeneration and remyelination in a  
015 demyelination mouse model. *Stem Cell Reports* **18**, 519-533 (2023).
- 016 55. E. D. Jong *et al.*, Soluble CX3CL1-expressing retinal pigment epithelium cells protect rod photoreceptors  
017 in a mouse model of retinitis pigmentosa. *Stem Cell Res Ther* **14**, 212 (2023).
- 018 56. C. Lauro, M. Catalano, F. Trettel, C. Limatola, Fractalkine in the nervous system: neuroprotective or  
019 neurotoxic molecule? *Ann N Y Acad Sci* **1351**, 141-148 (2015).
- 020 57. J. L. Puel, S. Saffiedine, C. Gervais d'Aldin, M. Eybalin, R. Pujol, Synaptic regeneration and functional  
021 recovery after excitotoxic injury in the guinea pig cochlea. *C R Acad Sci III* **318**, 67-75 (1995).
- 022 58. X. Y. Zheng, D. Henderson, B. H. Hu, S. L. McFadden, Recovery of structure and function of inner ear  
023 afferent synapses following kainic acid excitotoxicity. *Hear Res* **105**, 65-76 (1997).
- 024 59. Q. Wang, S. H. Green, Functional role of neurotrophin-3 in synapse regeneration by spiral ganglion  
025 neurons on inner hair cells after excitotoxic trauma in vitro. *J Neurosci* **31**, 7938-7949 (2011).
- 026 60. L. Shi *et al.*, Noise induced reversible changes of cochlear ribbon synapses contribute to temporary  
027 hearing loss in mice. *Acta Otolaryngol* **135**, 1093-1102 (2015).
- 028 61. L. Shi *et al.*, Ribbon synapse plasticity in the cochleae of Guinea pigs after noise-induced silent damage.  
029 *PLoS One* **8**, e81566 (2013).

- 030 62. K. X. Kim *et al.*, Vesicular Glutamatergic Transmission in Noise-Induced Loss and Repair of Cochlear  
031 Ribbon Synapses. *J Neurosci* **39**, 4434-4447 (2019).
- 032 63. T. T. Hickman, K. Hashimoto, L. D. Liberman, M. C. Liberman, Synaptic migration and reorganization  
033 after noise exposure suggests regeneration in a mature mammalian cochlea. *Sci Rep* **10**, 19945 (2020).
- 034 64. T. T. Hickman, K. Hashimoto, L. D. Liberman, M. C. Liberman, Cochlear Synaptic Degeneration and  
035 Regeneration After Noise: Effects of Age and Neuronal Subgroup. *Front Cell Neurosci* **15**, 684706 (2021).
- 036 65. P. W. C. Jeffers, J. Bourien, A. Diuba, J. L. Puel, S. G. Kujawa, Noise-Induced Hearing Loss in Gerbil:  
037 Round Window Assays of Synapse Loss. *Front Cell Neurosci* **15**, 699978 (2021).
- 038 66. M. Holmgren *et al.*, Mechanical overstimulation causes acute injury and synapse loss followed by fast  
039 recovery in lateral-line neuromasts of larval zebrafish. *Elife* **10**, (2021).
- 040 67. T. Kaur, K. K. Ohlemiller, M. E. Warchol, Genetic disruption of fractalkine signaling leads to enhanced  
041 loss of cochlear afferents following ototoxic or acoustic injury. *J Comp Neurol* **526**, 824-835 (2018).
- 042 68. C. C. Wu *et al.*, Altered expression of genes regulating inflammation and synaptogenesis during regrowth  
043 of afferent neurons to cochlear hair cells. *PLoS One* **15**, e0238578 (2020).
- 044 69. R. M. Ransohoff, L. Liu, A. E. Cardona, Chemokines and chemokine receptors: multipurpose players in  
045 neuroinflammation. *Int Rev Neurobiol* **82**, 187-204 (2007).
- 046 70. D. Maciejewski-Lenoir, S. Chen, L. Feng, R. Maki, K. B. Bacon, Characterization of fractalkine in rat brain  
047 cells: migratory and activation signals for CX3CR-1-expressing microglia. *J Immunol* **163**, 1628-1635  
048 (1999).
- 049 71. G. E. Garcia *et al.*, NF-kappaB-dependent fractalkine induction in rat aortic endothelial cells stimulated  
050 by IL-1beta, TNF-alpha, and LPS. *J Leukoc Biol* **67**, 577-584 (2000).
- 051 72. V. Zujovic, J. Benavides, X. Vige, C. Carter, V. Taupin, Fractalkine modulates TNF-alpha secretion and  
052 neurotoxicity induced by microglial activation. *Glia* **29**, 305-315 (2000).
- 053 73. V. Zujovic, N. Schussler, D. Jourdain, D. Duverger, V. Taupin, In vivo neutralization of endogenous brain  
054 fractalkine increases hippocampal TNFalpha and 8-isoprostane production induced by  
055 intracerebroventricular injection of LPS. *J Neuroimmunol* **115**, 135-143 (2001).
- 056 74. D. B. Re, S. Przedborski, Fractalkine: moving from chemotaxis to neuroprotection. *Nat Neurosci* **9**, 859-  
057 861 (2006).
- 058 75. A. Lyons *et al.*, Fractalkine-induced activation of the phosphatidylinositol-3 kinase pathway attenuates  
059 microglial activation in vivo and in vitro. *J Neurochem* **110**, 1547-1556 (2009).
- 060 76. N. Mizutani *et al.*, Dose-dependent differential regulation of cytokine secretion from macrophages by  
061 fractalkine. *J Immunol* **179**, 7478-7487 (2007).
- 062 77. R. C. Paolicelli, K. Bisht, M. E. Tremblay, Fractalkine regulation of microglial physiology and  
063 consequences on the brain and behavior. *Front Cell Neurosci* **8**, 129 (2014).
- 064 78. T. Mizuno, J. Kawanokuchi, K. Numata, A. Suzumura, Production and neuroprotective functions of  
065 fractalkine in the central nervous system. *Brain Res* **979**, 65-70 (2003).
- 066 79. B. Milon *et al.*, A cell-type-specific atlas of the inner ear transcriptional response to acoustic trauma. *Cell*  
067 *Rep* **36**, 109758 (2021).
- 068 80. N. F. Neel, E. Schutyser, J. Sai, G. H. Fan, A. Richmond, Chemokine receptor internalization and  
069 intracellular trafficking. *Cytokine Growth Factor Rev* **16**, 637-658 (2005).
- 070 81. E. M. Borroni, A. Mantovani, M. Locati, R. Bonecchi, Chemokine receptors intracellular trafficking.  
071 *Pharmacol Ther* **127**, 1-8 (2010).
- 072 82. A. E. Cardona *et al.*, Scavenging roles of chemokine receptors: chemokine receptor deficiency is  
073 associated with increased levels of ligand in circulation and tissues. *Blood* **112**, 256-263 (2008).
- 074 83. Y. Ishida, J. L. Gao, P. M. Murphy, Chemokine receptor CX3CR1 mediates skin wound healing by  
075 promoting macrophage and fibroblast accumulation and function. *J Immunol* **180**, 569-579 (2008).
- 076 84. D. Rodriguez *et al.*, Fractalkine isoforms differentially regulate microglia-mediated inflammation and  
077 enhance visual function in the diabetic retina. *J Neuroinflammation* **21**, 42 (2024).
- 078 85. D. Rodriguez *et al.*, Therapeutic Delivery of Soluble Fractalkine Ameliorates Vascular Dysfunction in the  
079 Diabetic Retina. *Int J Mol Sci* **25**, (2024).
- 080 86. S. Apostolakis, D. Spandidos, Chemokines and atherosclerosis: focus on the CX3CL1/CX3CR1 pathway.  
081 *Acta Pharmacol Sin* **34**, 1251-1256 (2013).
- 082 87. S. L. Greenberg, J. M. Nedzelski, Medical and noninvasive therapy for Meniere's disease. *Otolaryngol*  
083 *Clin North Am* **43**, 1081-1090 (2010).

- 084 88. H. C. Lin, Y. Ren, A. C. Lysaght, S. Y. Kao, K. M. Stankovic, Proteome of normal human perilymph and  
085 perilymph from people with disabling vertigo. *PLoS One* **14**, e0218292 (2019).  
086 89. H. Lang *et al.*, The Stria Vascularis in Mice and Humans Is an Early Site of Age-Related Cochlear  
087 Degeneration, Macrophage Dysfunction, and Inflammation. *J Neurosci* **43**, 5057-5075 (2023).  
088 90. D. N. Cook *et al.*, Generation and analysis of mice lacking the chemokine fractalkine. *Mol Cell Biol* **21**,  
089 3159-3165 (2001).  
090 91. A. N. Salt, J. Hartsock, S. Plontke, C. LeBel, F. Piu, Distribution of dexamethasone and preservation of  
091 inner ear function following intratympanic delivery of a gel-based formulation. *Audiol Neurootol* **16**, 323-  
092 335 (2011).  
093 92. M. R. Elmore *et al.*, Colony-stimulating factor 1 receptor signaling is necessary for microglia viability,  
094 unmasking a microglia progenitor cell in the adult brain. *Neuron* **82**, 380-397 (2014).  
095

096 **Acknowledgments:** We are thankful to Rene Vielman Quevedo for providing training with transtympanic  
097 injection in mice, to the translational hearing center auditory and vestibular technology (AVT) core and to the  
098 hearing research group at Creighton University for constructive criticism that tremendously improved the  
099 manuscript.

100  
101 **Funding:**

102 National Institute of General Medical Science CoBRE Award P20GM139762 (TK)

103 National Institute on Deafness and Other Communication Diseases grant R01 DC019918 (TK)

104 Nebraska State Funds (TK)

105 Bellucci Translational Hearing Research Funds (TK)

106 Bellucci Postdoctoral Research Funds (VPM)

107  
108 **Author contributions:**

109 Conceptualization: TK

110 Methodology: VPM, SPM, DYG, ARS, LB, SVM, TK

111 Investigation: VPM, SPM, DYG, ARS, LB, SVM, TK

112 Visualization: VPM, SPM, DYG, ARS, LB, SVM, TK

113 Funding acquisition: TK, VPM

114 Project administration: TK

115 Supervision: TK

116 Writing – original draft: VPM

117 Writing – review & editing: TK, AC

118

119 **Competing interests:** Patent is pending for fractalkine as a treatment for hidden hearing loss.

120

121 **Data and materials availability:** All data are available in the main text or the supplementary materials.
